# Supplementary material for: Regulatory T Cells Restrain Interleukin-2- and Blimp-1-Dependent Acquisition of Cytotoxic Function by CD4+ T Cells
Source: PubMed Central journal article supplement (PMC7369640; doi:10.1016/j.immuni.2019.12.007), 2020-01-14
Supplement: mmc5.pdf [file mmc5.pdf]

# Immunity

## Regulatory T Cells Restrain Interleukin-2- and Blimp-1-Dependent Acquisition of Cytotoxic Function by CD4<sup>+</sup> T Cells

### Graphical Abstract

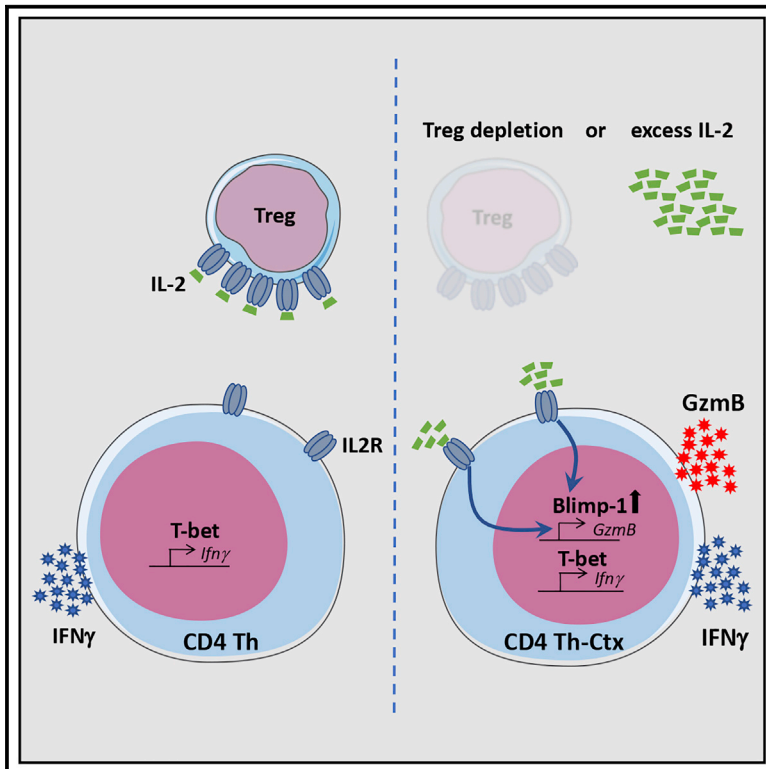

### Authors

Anna Śledzińska, Maria Vila de Mucha, Katharina Bergerhoff, ..., Richard G. Jenner, Karl S. Peggs, Sergio A. Quezada

### Correspondence

k.peggs@ucl.ac.uk (K.S.P.), s.quezada@ucl.ac.uk (S.A.Q.)

### In Brief

Śledzińska et al. show that upon depletion of regulatory T cells, a surplus of interleukin-2 in the tumor microenvironment supports acquisition of cytotoxic activity by T helper cells orchestrated by the transcription factor Blimp-1. These polyfunctional CD4<sup>+</sup> T cells exhibit potent anti-tumor activity in an adoptive transfer setting with therapeutic implications.

### Highlights

- Tumor-infiltrating CD4<sup>+</sup> T cells exhibit T helper and cytotoxic features
- Treg cells limit IL-2 availability vital for the acquisition of cytotoxic features
- T-bet is required for IFN- $\gamma$ , but not GzmB, expression in CD4<sup>+</sup> TILs
- Blimp-1 is required for GzmB expression in response to IL-2 in CD4<sup>+</sup> TILs

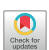

# Regulatory T Cells Restrain Interleukin-2- and Blimp-1-Dependent Acquisition of Cytotoxic Function by CD4<sup>+</sup> T Cells

Anna Śledzińska,<sup>1,2</sup> Maria Vila de Mucha,<sup>1,3</sup> Katharina Bergerhoff,<sup>1,2</sup> Alastair Hotblack,<sup>2</sup> Dafne Franz Demane,<sup>1,2</sup> Ehsan Ghorani,<sup>1,2</sup> Ayse U. Akarca,<sup>4</sup> Maria A.V. Marzolini,<sup>1,2</sup> Isabelle Solomon,<sup>1,2</sup> Frederick Arce Vargas,<sup>1,2</sup> Martin Pule,<sup>2</sup> Masahiro Ono,<sup>5</sup> Benedict Seddon,<sup>6</sup> George Kassiotis,<sup>7</sup> Charlotte E. Ariyan,<sup>8</sup> Thomas Korn,<sup>9</sup> Teresa Marafioti,<sup>4</sup> Graham M. Lord,<sup>10</sup> Hans Stauss,<sup>6</sup> Richard G. Jenner,<sup>3</sup> Karl S. Peggs,<sup>1,2,\*</sup> and Sergio A. Quezada<sup>1,2,11,\*</sup>

<sup>1</sup>Cancer Immunology Unit, UCL Cancer Institute, University College London, London WC1E 6DD, UK

<sup>2</sup>Research Department of Haematology, University College London, Cancer Institute, London WC1E 6DD, UK

<sup>3</sup>Regulatory Genomics Research Group, UCL Cancer Institute, University College London, London WC1E 6DD, UK

<sup>4</sup>Department of Cellular Pathology, University College London Hospital, London NW1 2BU, UK

<sup>5</sup>Faculty of Natural Sciences, Department of Life Sciences, Imperial College London, London SW7 2BB, UK

<sup>6</sup>Institute of Immunity and Transplantation, Department of Immunology, Royal Free Hospital, London NW3 2PF, UK

<sup>7</sup>Retroviral Immunology Laboratory, The Francis Crick Institute, 1 Midland Road, London NW1 1AT, UK

<sup>8</sup>Memorial Sloan Kettering Center, 1275 York Avenue, New York, NY 10065, USA

<sup>9</sup>Department of Experimental Neuroimmunology, Klinikum rechts der Isar, Technical University of Munich, 81675 Munich, Germany

<sup>10</sup>Faculty of Biology, Medicine and Health, University of Manchester, 46 Grafton Street, Manchester M13 9NT, UK

<sup>11</sup>Lead Contact

\*Correspondence: [k.peggs@ucl.ac.uk](mailto:k.peggs@ucl.ac.uk) (K.S.P.), [s.quezada@ucl.ac.uk](mailto:s.quezada@ucl.ac.uk) (S.A.Q.)

<https://doi.org/10.1016/j.immuni.2019.12.007>

## SUMMARY

In addition to helper and regulatory potential, CD4<sup>+</sup> T cells also acquire cytotoxic activity marked by granzyme B (GzmB) expression and the ability to promote rejection of established tumors. Here, we examined the molecular and cellular mechanisms underpinning the differentiation of cytotoxic CD4<sup>+</sup> T cells following immunotherapy. CD4<sup>+</sup> transfer into lymphodepleted animals or regulatory T (Treg) cell depletion promoted GzmB expression by tumor-infiltrating CD4<sup>+</sup>, and this was prevented by interleukin-2 (IL-2) neutralization. Transcriptional analysis revealed a polyfunctional helper and cytotoxic phenotype characterized by the expression of the transcription factors T-bet and Blimp-1. While T-bet ablation restricted interferon- $\gamma$  (IFN- $\gamma$ ) production, loss of Blimp-1 prevented GzmB expression in response to IL-2, suggesting two independent programs required for polyfunctionality of tumor-reactive CD4<sup>+</sup> T cells. Our findings underscore the role of Treg cells, IL-2, and Blimp-1 in controlling the differentiation of cytotoxic CD4<sup>+</sup> T cells and offer a pathway to enhancement of anti-tumor activity through their manipulation.

## INTRODUCTION

Shortly after the definition of the classical T helper (Th) type 1 (Th1) and type 2 (Th2) lineages (Mosmann et al., 1986), it was reported that mycobacterial antigens could induce the development of

cytotoxic CD4<sup>+</sup> T cells (Mustafa and Godal, 1987; Ottenhoff et al., 1988). Such cytotoxic CD4<sup>+</sup> T cells are found in both mice and humans in a wide range of pathological conditions (Juno et al., 2017), including murine cancer models where melanoma-reactive CD4<sup>+</sup> T cells acquire cytotoxic activity and eliminate large transplantable and spontaneous mouse melanoma tumors (Quezada et al., 2010; Xie et al., 2010). Similarly, NY-ESO-1-specific CD4<sup>+</sup> T cells isolated from melanoma patients are able to lyse melanoma cells expressing the cognate antigen. Moreover, the number of these cells in the blood increases after treatment with ipilimumab ( $\alpha$ CTLA-4) (Kitano et al., 2013).

Several attempts have been made to define a set of surface markers that separate cytotoxic CD4<sup>+</sup> T cells from other Th subsets, but there is no consensus as to whether such markers exist. Indeed, it is now widely accepted that CD4<sup>+</sup> T cell lineages exhibit a degree of plasticity, with cells simultaneously expressing markers of more than one Th lineage and retaining the ability to switch phenotypes during their lifespan (DuPage and Bluestone, 2016). In keeping with this, granzyme B (GzmB)-secreting cytotoxic CD4<sup>+</sup> T cells exhibit activation markers, cytokines, and transcription factors associated with different Th subsets (Takeuchi and Saito, 2017; Tian et al., 2016). Perforin (*PRF1*)-expressing human CD4<sup>+</sup> T cells produce tumor necrosis factor  $\alpha$  (TNF- $\alpha$ ), interferon- $\gamma$  (IFN- $\gamma$ ), and granzyme A (Gzma) (Appay et al., 2002).

The transcription factors involved in the differentiation of cytotoxic CD4<sup>+</sup> T cells *in vivo* remain unclear. T-bet (*Tbx21*) and Eomes are potential candidates due to their well-established role in controlling Th1 responses and inducing *Gzmb* and *Prf1* expression in CD8<sup>+</sup> T and natural killer (NK) cells (Evans and Jenner, 2013; Glimcher et al., 2004). T-bet also directly binds and activates *GZMB*, *PRF1*, and *NKG7* in CD4<sup>+</sup> T cells *in vitro* (Kanhare et al., 2012). Studies in an adenovirus infection model showed that the cytotoxic program does not correlate with

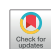

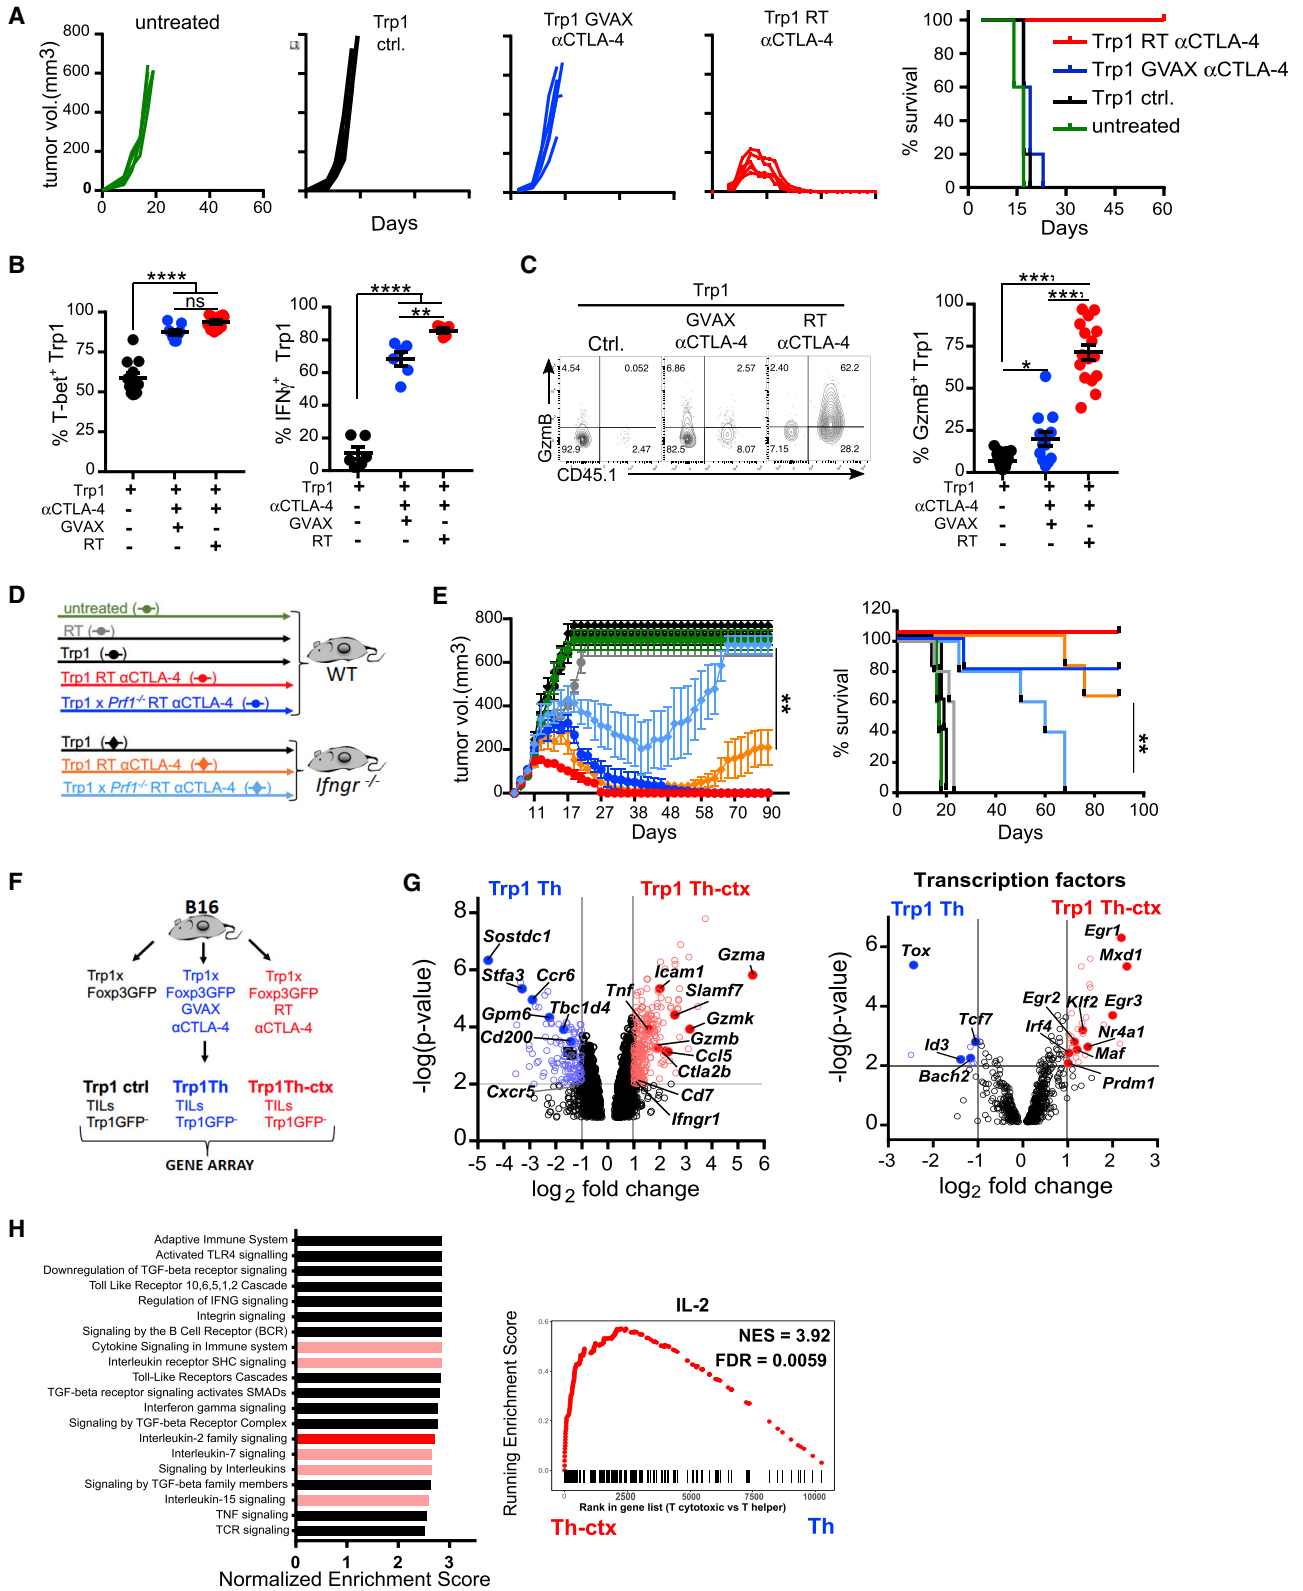

**Figure 1. Tumor-Reactive CD4<sup>+</sup> T Cells Acquire Cytotoxic Phenotype following Lymphopenia-Induced Expansion**

(A–C) B16-tumor-bearing mice were left untreated or treated with Trp1 cells (Trp1 ctrl.), Trp1 + GVAX +  $\alpha$ CTLA-4, or RT + Trp1 +  $\alpha$ CTLA-4 as per Figure S1A. (A) Tumor growth and survival (N = 5/group). (B) T-bet and IFN- $\gamma$  expression by Trp1 TILs (N = 10–11/group in 2 experiments) and

(legend continued on next page)

T-bet or Eomes expression and instead is in direct opposition to the Bcl6-driven follicular helper T (Tfh) cell differentiation program (Donnarumma et al., 2016). These virus-induced cytotoxic cells also exhibit higher expression of *Prdm1*, encoding the transcriptional repressor Blimp-1, previously shown to inhibit *Bcl6* and *Tcf7* expression in CD4<sup>+</sup> T cells (Choi et al., 2015; Fu et al., 2017; Johnston et al., 2009; Wu et al., 2015).

The list of potential environmental factors regulating cytotoxic cell development ranges from T cell receptor (TCR) signal strength to members of the common gamma ( $\gamma$ ) chain cytokine family or IFN- $\alpha$  (Hua et al., 2013). *In vitro*, exogenous interleukin-2 (IL-2) increases the lytic potential of CD4<sup>+</sup> T cells in response to low antigen dose (Brown et al., 2009), and IL-2 is a potent inducer of perforin and GzmB in CD8<sup>+</sup> T cells (Janas et al., 2005). IL-2 opposes the differentiation of Tfh cells by decreasing Bcl6 expression (Ballesteros-Tato et al., 2012), hence playing a role in controlling the Bcl6/Blimp-1/Tcf1 balance (Fu et al., 2017).

Here, we examined the environmental signals and transcription factors regulating the development of cytotoxic CD4<sup>+</sup> T cells within tumors and in the context of immunotherapy. In the adoptive cell therapy (ACT) setting, melanoma-specific TCR transgenic CD4<sup>+</sup> T cells produced both IFN- $\gamma$  and GzmB within tumors, suggesting that these cells have both helper and cytotoxic activities (Th-ctx). Transcriptional analysis of Th-ctx melanoma-reactive CD4<sup>+</sup> T cells revealed high *Prdm1* and *Tbx21* expression and decreased expression of Tfh signature genes. IL-2 was central to the acquisition of the cytotoxic program in CD4<sup>+</sup> T cells, functioning in a Blimp-1-dependent manner, and independent of the Th1 transcriptional program. Our findings provide insight into the mechanisms and context supporting the acquisition of cytotoxic function by CD4<sup>+</sup> T cells, with implications for immunotherapies.

## RESULTS

### CD4<sup>+</sup> TCR Transgenic T Cells Acquire a Polyfunctional Th-Cytotoxic Phenotype upon Transfer into Tumor-Bearing Lymphopenic Mice

Upon transfer into tumor-bearing lymphodepleted animals, melanoma-reactive tryp-1-specific TCR transgenic CD4<sup>+</sup> T cells (Trp1 cells) produce IFN- $\gamma$ , TNF- $\alpha$ , and GzmB and acquire potent cytotoxic activity *in vitro* and *in vivo* (Quezada et al., 2010; Xie et al., 2010). To confirm whether this activity was specific to the Trp1 TCR or driven by therapeutic modality, we analyzed the activity of Trp1 cells in the context of host lymphodepletion combined with  $\alpha$ CTLA-4 treatment or in response to a granulocyte-macrophage colony-stimulating factor (GM-CSF)-expressing tumor cell based vaccine (GVAX) combined with  $\alpha$ CTLA-4, which also induces effective Trp1 cell activation and IFN- $\gamma$  secre-

tion *in vivo* (Simpson et al., 2013). B16 tumor-bearing mice were left untreated or treated at day 8 with total body irradiation (RT) + Trp1 +  $\alpha$ CTLA-4, Trp1 + GVAX +  $\alpha$ CTLA-4, or Trp1 cells in the absence of irradiation or vaccine as an additional control (referred to as control treatment [Trp1 ctrl.]) (Figure S1A). Transfer of Trp1 cells into irradiated hosts in combination with  $\alpha$ CTLA-4 promoted rejection of large, established tumors in all treated mice, whereas Trp1 + GVAX +  $\alpha$ CTLA-4 failed to drive complete responses (Figures 1A and S1B). To understand these different outcomes, we assessed the quantity and quality of Trp1 cell infiltrates following therapy. While both GVAX- and radiation-based therapies significantly enhanced Trp1 effector cell (CD4<sup>+</sup>Trp1<sup>+</sup>Foxp3<sup>-</sup>) proliferation within tumors, irradiation gave the largest, most significant increases in Trp1 effector numbers and  $\Delta$ T effector (Teff)/Regulatory T (Treg) cell ratio compared to Trp1 monotherapy (Figure S1B). Both treatments (RT + Trp1 +  $\alpha$ CTLA-4 and GVAX + Trp1 +  $\alpha$ CTLA-4) induced high levels of T-bet and IFN- $\gamma$  by tumor-infiltrating Trp1 cells (Figure 1B), suggesting acquisition of a Th1-like differentiation program. In contrast, only Trp1 CD4<sup>+</sup> T cells primed in the lymphopenic environment (RT + Trp1 +  $\alpha$ CTLA-4) increased GzmB expression, revealing a polyfunctional Th and cytotoxic phenotype (Figure 1C). TNF- $\alpha$  and IL-2 followed a similar pattern, with the highest levels observed in Trp1 expanded in lymphodepleted mice (Figure S1C; data not shown). GVAX-expanded Trp1 cells showed only a Th phenotype, with no significant increase in GzmB (from this point referred to as Trp1 Th). In keeping with the production of GzmB, Trp1 cells expanded in lymphopenic hosts specifically killed B16 tumor cells *in vitro* (Figure S1D). To determine the role of both helper and cytotoxic activities of Trp1 cells in tumor rejection, we transferred either Trp1 or perforin-1-deficient Trp1 cells (*Prf1*<sup>-/-</sup>Trp1) (Figure S1E) into wild-type (WT) or *Ifngr1*<sup>-/-</sup> hosts combined with radiation and  $\alpha$ CTLA-4 (Figure 1D). *Prf1*<sup>-/-</sup>Trp1 cells have reduced cytotoxicity (Kägi et al., 1994), while IFN- $\gamma$ R-deficient myeloid cells are less able to support Th-1 differentiation *in vivo* (Tau and Rothman, 1999). While WT recipients treated with *Prf1*<sup>-/-</sup>Trp1 cells grew larger tumors than mice treated with Trp1 cells ( $p < 0.01$ , between days 13 and 23), both treatments promoted rejection of established tumors. IFN- $\gamma$ R-deficient recipients treated with Trp1 + RT +  $\alpha$ CTLA-4 showed partial tumor control followed by relapse. *Prf1*<sup>-/-</sup>Trp1 cells transferred to IFN- $\gamma$ R-deficient were unable to control tumor growth (Figures 1E and S1F), confirming that both Th1 and cytotoxic activities of Trp1 cells (Trp1 Th-ctx) are critical for maximal tumor control. We thus focused on investigating the molecular and environmental factors underpinning acquisition of cytotoxic activity by CD4<sup>+</sup> T cells.

To gain insight into the molecular processes distinguishing Trp1 Th-ctx cells from Trp1 Th cells, we performed gene expression profiling on Trp1 Foxp3<sup>-</sup> cells isolated from tumor and

(N = 5–6/group in two experiments), respectively. (C) Representative plot and quantification of GzmB expression by Trp1 TILs (N = 13–17/group in four experiments).

(D and E) WT and *Ifngr1*<sup>-/-</sup> mice bearing B16 tumors were left untreated or treated with Trp1 or Trp1xPrf-1<sup>-/-</sup> cells alone or in combination with RT +  $\alpha$ CTLA-4. (E) Tumor growth and survival (N = 5/group).

(F–H) Foxp3<sup>-</sup> Trp1 cells were sorted from B16 tumors from mice treated with GVAX +  $\alpha$ CTLA-4 or RT +  $\alpha$ CTLA-4 as per Figure S1D. (G) Total differential gene expression between Th Trp1 cells and Th-ctx Trp1 cells ( $p \leq 0.01$ ) and differentially expressed transcription factors between Trp1 Th-ctx cells and Trp1 Th cells ( $p \leq 0.01$ ). (H) Reactome pathway enrichment analysis of immune-system-related pathways and cytokine signaling pathways (red) (NES > 2,  $p < 0.05$ ). Right panel: gene set enrichment analysis of IL-2-dependent genes (Castro et al., 2012; GEO: GSE39110).

All quantification plots show mean  $\pm$  SEM (one-way ANOVA).

draining lymph nodes (dLNs) 8 days after treatment initiation (Figures 1F and S1G). Comparison of Trp1 Th-ctx cells to Trp1 Th cells isolated from tumors identified 382 differentially expressed genes ( $p < 0.01$  and  $\log_2$  fold change  $\geq 2$ ) (Table S1). *Gzmb*, *Gzma*, *Gzmk*, *Icam1*, and *Tnf* were found to be among the most increased genes in Trp1 Th-ctx compared to Trp1 Th cells, in keeping with our prior phenotypic analyses. We also observed higher expression of genes previously reported to be increased in cytotoxic CD4<sup>+</sup> T cells recognizing viral antigens (Donnarumma et al., 2016), such as *Ccl5*, *Ctla2b*, and *Cd7*. There was, however, no significant difference in *Prf1* expression between the two conditions (Figure S1H).

Transcription factor genes increased in Trp1 Th-ctx cells (Table S2) included those belonging to the Kruppel-like factor family (*Klf2*, *Klf7*, and *Klf10*), of which *Klf2* is known to promote T-bet and Blimp-1 expression (Lee et al., 2015), as well as transcription factors with established roles in shaping CD4<sup>+</sup> T cell fate, including *Maf*, *Irf4*, *Prdm1*, and *Egr1* (Fu et al., 2017; Zhu and Paul, 2010) (Figure 1G). When analyzing the genes with significantly increased expression in GVAX-expanded Trp1 Th cells compared to Trp1 Th-ctx cells, we identified a set of genes previously reported to be associated with Tfh cells or natural Th21 cells, including *Sostdc1*, *Stfa3*, *Tox*, *Ccr6*, *Tcf7* (encoding TCF-1), *Gpm6b*, and *Cd200* (Marnik et al., 2017; Choi et al., 2015) (Figure 1G). While the genes highly expressed in Th-ctx cells do not specifically match a single defined CD4<sup>+</sup> helper lineage (i.e., Th1, Th2, Th17, and Th21), we noted that many differentially expressed genes are regulated by Blimp-1, including *Socs1*, *Slamf1*, *Grap2*, *Maf*, *Ctla4*, and *Il10* (Bankoti et al., 2017). *Tbx21* and other master regulators were not differentially expressed between Th and Th-ctx cells; instead, *Tbx21* expression was increased in both conditions in comparison to control Trp1 cells, consistent with our flow cytometry analyses (Figure S1H).

Reactome pathway analysis revealed an increased expression of genes related to the apoptosis/survival pathway, Toll-like receptor activation, and cytokine signaling, including C $\gamma$  chain receptor signaling pathways, in Trp1 Th-ctx cells in comparison to Trp1 Th tumor infiltrating lymphocytes (TILs) (Figure 1H). Consistent with the increased expression of C $\gamma$  chain cytokine signaling genes, gene set enrichment analysis (GSEA) showed enrichment of IL-2 responsive genes (Castro et al., 2012) in Th-ctx conditions (Figure 1H). There were no significantly enriched pathways directly related to the immune system in Trp1 Th cells in comparison to Th-ctx cells (Figure S1I).

Taken together, these data suggest that both therapeutic modalities (GVAX +  $\alpha$ CTLA-4 and RT +  $\alpha$ CTLA-4) promote differentiation of Trp1 T cells into a core polyfunctional Th cell phenotype with marked Th1-like characteristics. However, while GVAX +  $\alpha$ CTLA-4 favored a Th follicular-like signature in tumor-infiltrating Trp1 cells, RT +  $\alpha$ CTLA-4 supported the acquisition of additional transcriptional programs associated with cytotoxicity (Th-ctx).

### Endogenous IL-2 Drives GzmB Expression in Both Murine and Human CD4<sup>+</sup> T Cells *In Vitro*

To determine whether the acquisition of the polyfunctional Th1 and cytotoxic phenotype was specific to the Trp1 system, we repeated these experiments in mice bearing B16 tumors expressing ovalbumin (B16-OVA) and treated with OVA-reactive

OT-II TCR Tg CD4<sup>+</sup> T cells (Figure S2A). OT-II cells transferred into irradiated B16-OVA-bearing mice expressed GzmB and promoted rejection of established tumors consistent with the Trp1 model (Figures 2A and S2A). GzmB<sup>+</sup> OT-II cells also co-expressed T-bet (Figure 2B) and were able to directly kill B16-OVA tumor in a GzmB-dependent manner (Figures 2C and S2B). These data suggest that acquisition of Th-ctx cell phenotype is not unique to the Trp1 TCR.

Increased expression of genes associated with C $\gamma$  chain cytokine signaling and the response to IL-2 in Trp1 Th-ctx is consistent with the cytokine milieu induced by lymphodepletion (Williams et al., 2007) and could offer mechanistic insights into the acquisition of cytotoxic activity by tumor-reactive CD4<sup>+</sup> T cells *in vivo*. We therefore evaluated the potential contribution of C $\gamma$  receptor cytokines to the gain of GzmB in tumor-reactive CD4<sup>+</sup> T cells. Briefly, Trp1 and OT-II TCR transgenic T cells were stimulated 3 days *in vitro* with different concentrations of cognate antigen, in the presence or absence of IL-2, IL-7, or IL-15. Both Trp1 and OT-II T cells increased GzmB production with increasing antigen dose, while exogenous IL-2 augmented GzmB at lower antigen concentrations (Figures 2D and S2C). IL-2 was the most potent inducer of GzmB at low antigen concentration, followed by IL-15 and, at a much lower level, IL-7 (Figure 2E). Endogenous IL-2 was critical for GzmB production *in vitro*, as both IL-2 neutralization and CD25 receptor blockade reduced GzmB expression by transgenic cells in response to antigen (Figures 2F and S2C).

The high levels of T-bet in Trp1 and OT-II Th-ctx cells led us to evaluate its possible association with IL-2 and GzmB expression. While IL-2 deprivation reduced T-bet expression by *in-vitro*-activated OT-II cells (Figure S2D), the impact on T-bet was less marked than the impact on GzmB, suggesting that these two pathways may not be directly linked. Further validation was obtained using polyclonal mouse CD4<sup>+</sup> T cells stimulated with  $\alpha$ CD3 + IL-2. Increasing amounts of IL-2 significantly augmented both GzmB and perforin expression in CD4<sup>+</sup> T cells (Figure 2G). Furthermore, endogenous IL-2 was critical for the increase of GzmB expression in polyclonal CD4<sup>+</sup> T cells stimulated with  $\alpha$ CD3 and  $\alpha$ CD28, as IL-2 neutralization diminished GzmB expression with minimal impact on T-bet (Figure 2H). Consistent with the mouse data, stimulation of naive human CD4<sup>+</sup> T cells with  $\alpha$ CD3 and  $\alpha$ CD28 resulted in GzmB expression in 60% of the cells. This increased to 95% upon addition of exogenous IL-2. In contrast, blockade of IL-2R signaling with  $\alpha$ CD25 (basiliximab) significantly reduced GzmB to untreated control levels (Figure 2I).

IL-2 deprivation is utilized by Treg cells to suppress T-cell-mediated immunity, primarily impacting proliferation and survival (Sakaguchi et al., 2008). To determine whether Treg cells also suppress acquisition of cytotoxic potential by CD4<sup>+</sup> T cells, we activated purified human naive CD4<sup>+</sup> T cells and co-cultured them with different ratios of autologous Treg cells. Low numbers of Treg cells (1:10 Treg/Teff cells) significantly suppressed GzmB expression, whereas T-bet was only partially affected (Figure 2J; data not shown). A higher ratio of Treg:Teff cells was needed in order to effectively suppress CD4<sup>+</sup> Teff cell proliferation *in vitro* (Figures 2J and

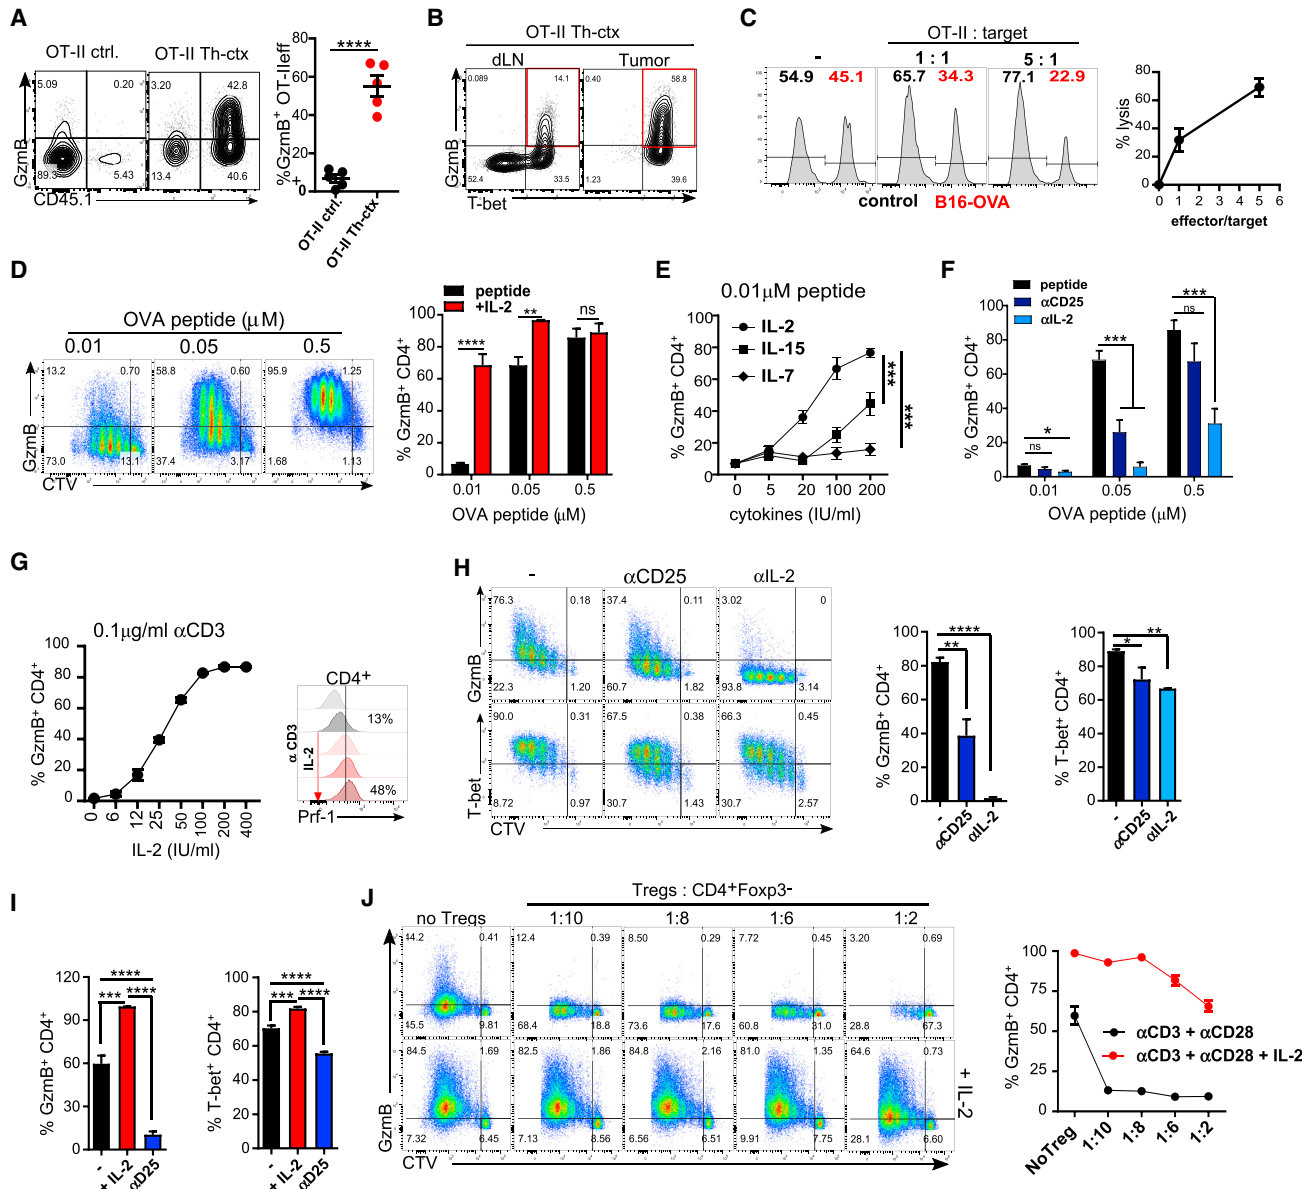

### Figure 2. IL-2 Drives GzmB Expression in Both Murine and Human CD4<sup>+</sup> T Cells *In Vitro*

(A and B) OT-II cells were transferred to mice bearing B16-OVA tumors (as per Figure S2A) alone or in combination with RT + αCTLA-4. (A) Representative plots and quantification of GzmB-expressing OT-II TILs (N = 5/group). (B) Representative plots showing expression of GzmB and T-bet by OT-II cells in the Th-ctx condition.

(C) OT-II cytotoxicity assay. Representative plots and quantification of specific lysis are shown.

(D–F) Cell trace violet (CTV)-labeled OT-II cells were stimulated with indicated concentrations of OT-II peptide to assess GzmB expression within proliferating cells in the following conditions: (D) addition of IL-2 (two independent experiments), (E) addition of indicated cytokines, and (F) addition of 5 μg/ml of indicated antibodies.

(G and H) CTV-labeled murine polyclonal CD4<sup>+</sup> T cells were stimulated with (G) αCD3 and IL-2 to assess expression of GzmB in proliferating CD4<sup>+</sup> T cells. A representative plot of perforin expression is also shown. (H) αCD3 and αCD28 and indicated antibodies. Representative plots and quantification of GzmB and T-bet-expressing cells (data are representative of two independent experiments).

(I and J) CTV-labeled human polyclonal naive CD4<sup>+</sup> T cells stimulated with αCD3 and αCD28. (I) After 24 h, either IL-2 or αCD25 antibody was added. Quantification of GzmB- and T-bet-expressing CD4<sup>+</sup> T cells (cumulative data of two independent experiments). (J) Indicated ratios of autologous Treg cells added with or without IL-2. Representative plots and quantification of GzmB-expressing CD4<sup>+</sup> T cells are shown.

All quantification plots show mean ± SEM (one-way ANOVA) (B, two-way ANOVA).

S2E). Exogenous IL-2 was able to revert both effects, increasing GzmB production and proliferation even at the highest Treg/Teff cell ratios. These data suggest that endoge-

nous IL-2 drives GzmB expression on CD4<sup>+</sup> Teff cells while Treg cells negatively control this process, potentially through IL-2 competition.

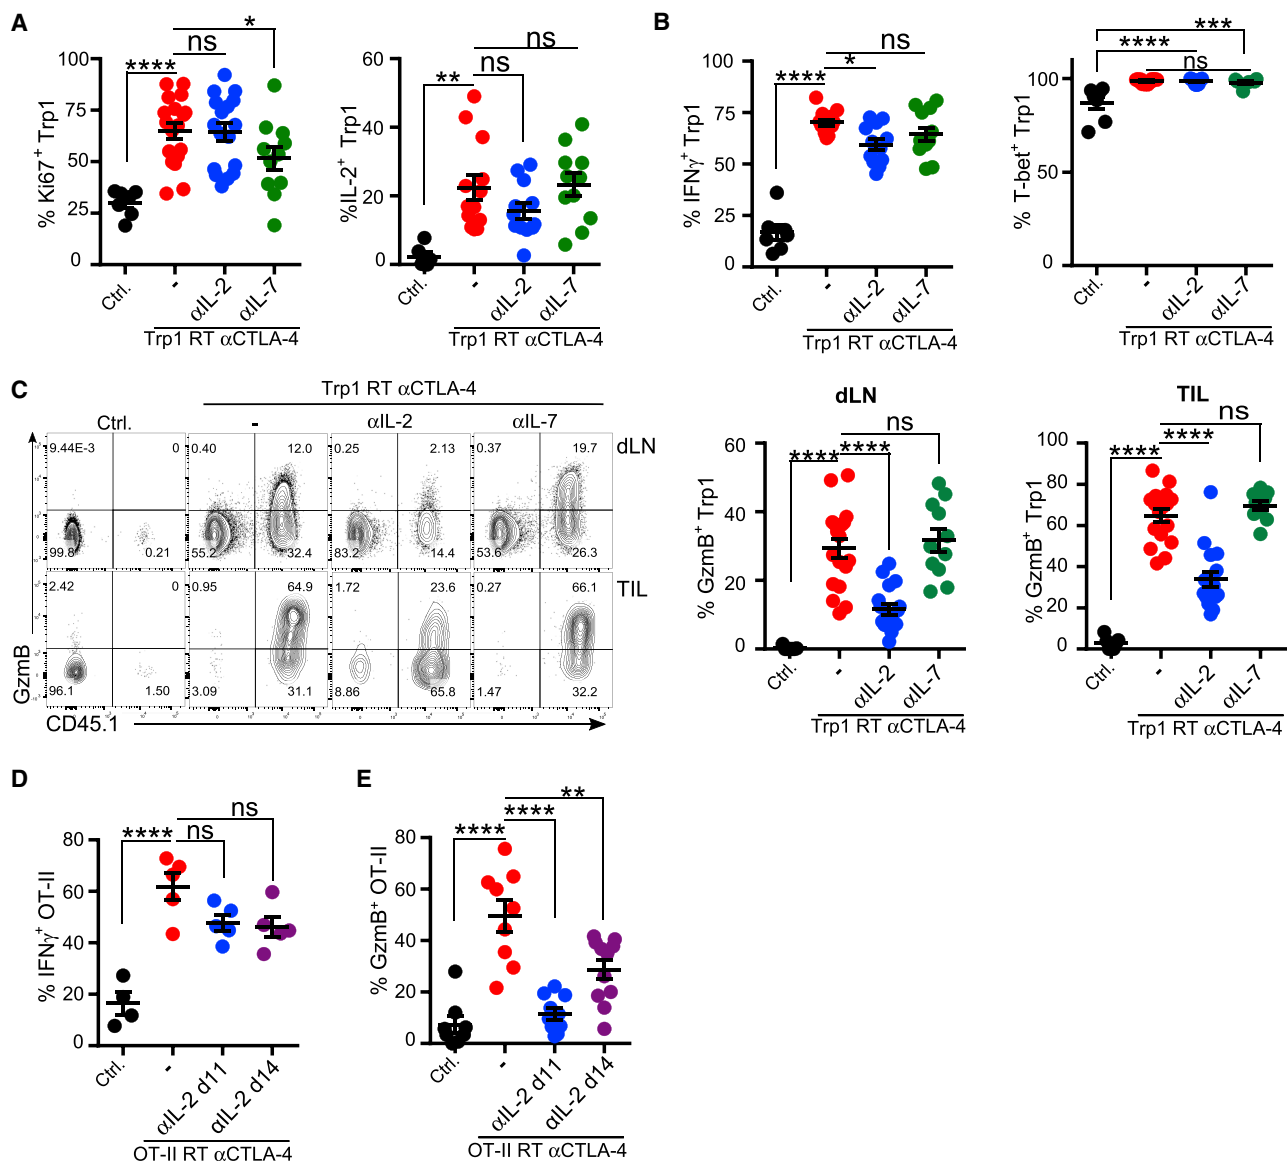

**Figure 3. CD4 TILs in the Th-ctx Condition Reduce GzmB Expression but Retain the Th1 Phenotype upon IL-2 Neutralization**

(A–C) B16-tumor-bearing mice were left untreated (Ctrl) or received RT + Trp1 + αCTLA-4 (Th-ctx) with or without αIL-2 or αIL-7 (see Figure S3A). Quantification of (A) Ki-67- (N = 7–18/group) and IL-2-expressing Trp1 cells (N = 7–13/group), (B) T-bet- and IFN-γ- expressing Trp1 cells (N = 7–13/group in two independent experiments), and (C) GzmB expression in Trp1 (CD45.1<sup>+</sup>) and endogenous CD4<sup>+</sup> T cells in LN and tumors (N = 7–13/group in three experiments).

(D and E) B16-OVA-tumor-bearing mice were treated as shown in Figure S3D. Tumors and dLNs were isolated at day 18 post-tumor inoculation for analysis.

(D) Quantification of IFN-γ- (N = 5/group) and (E) GzmB-expressing cells within OT-II cells (N = 8–11/group in two experiments).

All quantification plots show mean ± SEM (one-way ANOVA).

### Endogenous IL-2 Contributes to an Increase in GzmB Expression by Adoptively Transferred Tumor-Reactive T Cells *In Vivo*

We sought to determine whether IL-2 controls GzmB expression in adoptively transferred tumor-reactive CD4<sup>+</sup> T cells *in vivo*. Briefly, B16-bearing mice received Trp1 cells alone (ctrl) or with irradiation and αCTLA-4 (Trp1 + RT + αCTLA-4) in the presence or absence of an αIL-2 neutralizing antibody. An additional group of mice received an αIL-7 neutralizing antibody to rule out its potential role in GzmB regulation *in vivo*, as this is relevant for CD8<sup>+</sup> T cells (Li et al., 2011). IL-2 or IL-7 neutrali-

zation was started 3 days after adoptive transfer to allow the initial expansion of transferred T cells (Figure S3A). IL-2 neutralization did not decrease the frequency of Ki67-expressing cells within the Trp1 cells in contrast to αIL-7 treatment, which significantly reduced CD4<sup>+</sup> Trp1 cell proliferation (Figure 3A). Tumor-infiltrating Trp1 Th-ctx cells expressed high levels of IL-2, with neither αIL-2 nor αIL-7 treatment impacting its expression (Figure 3A). As expected, IL-2 neutralization resulted in decreased expression of the high-affinity IL-2 receptor CD25 on activated CD4<sup>+</sup> T cells (Figure S3B). When assessing effector function, we observed a small decrease in IFN-γ

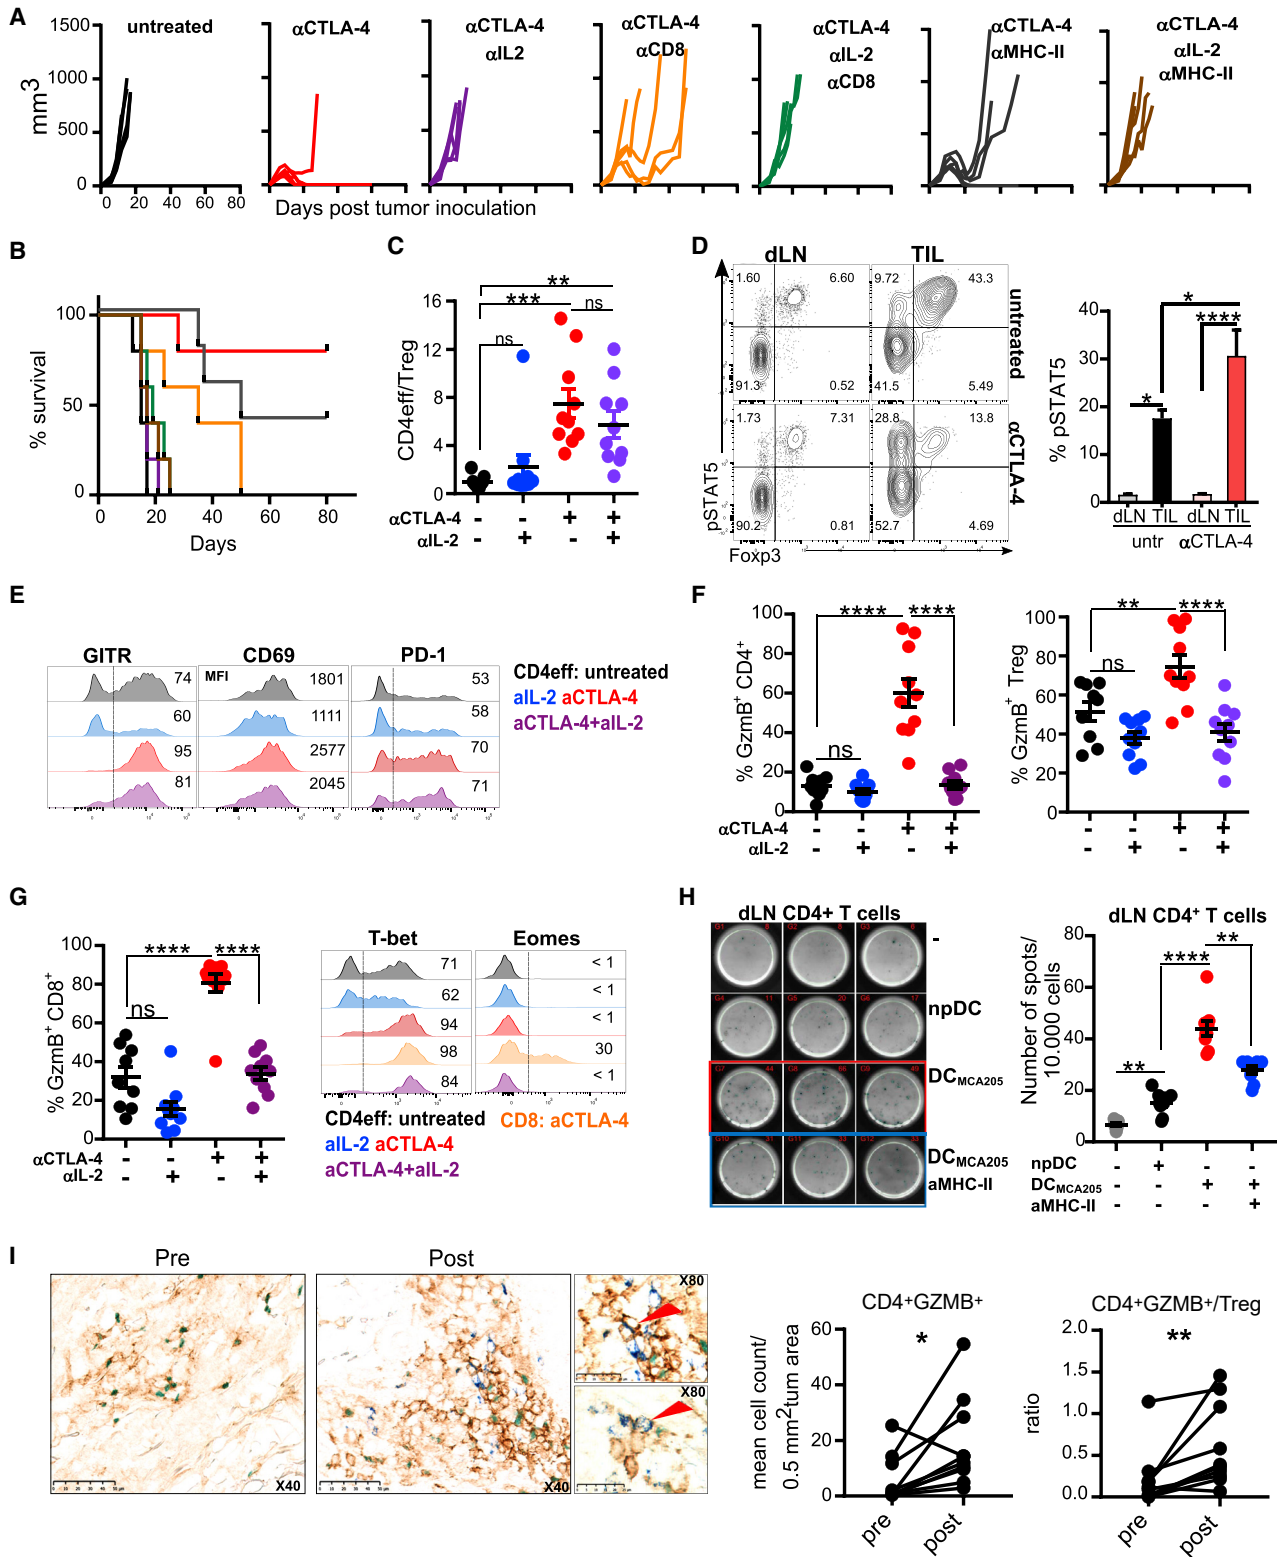

**Figure 4. Increased IL-2 Availability after Treg Cell Depletion Contributes to Shaping the Th Cell Phenotype within Tumors**  
 (A and B) MCA205-tumor-bearing mice were treated with  $\alpha$ CTLA-4 on days 6, 9, and 12 alone or with  $\alpha$ IL-2,  $\alpha$ CD8, and  $\alpha$ MHC class II on days 6, 9, 12, and 15 after tumor implantation. (A) Individual tumor growth curves and (B) cumulative survival are shown.  
 (C–G) MCA205-tumor-bearing mice were treated with  $\alpha$ CTLA-4,  $\alpha$ IL-2, or combination as in (A). TILs and dLNs were isolated 13 days post-tumor inoculation. (C) CD4eff/Treg cells in tumors (N = 10/group in two independent experiments). (D) TILs and dLNs from MCA205-bearing mice were re-stimulated with IL-2.  
 (legend continued on next page)



expression upon IL-2 neutralization, although T-bet expression was not significantly reduced (Figure 3B). Among the cytokines we analyzed in these settings, GM-CSF protein expression was partially decreased by IL-2 neutralization in the tumor, but not in dLNs (Figure S3C; data not shown). The frequency of Trp1<sup>+</sup>GzmB-expressing cells was, however, significantly reduced in  $\alpha$ IL-2-treated mice, both in the dLN and in the tumor (Figure 3C).  $\alpha$ IL-7 did not impact GzmB expression by Trp1 cells, recapitulating the *in vitro* data (Figure 3C). Similar results were obtained in the B16-OVA tumor and OT-II model (Figure S3D). In these experiments,  $\alpha$ IL-2 treatment started at two different time points post-OT-II T cell transfer based on previous experiments defining the temporal profile of GzmB expression (data not shown). IL-2 neutralization at both time points caused a moderate decrease in IFN- $\gamma$  expression by OT-II cells without affecting T-bet expression (Figure 3D; data not shown). The frequency of OT-II cells with lytic potential was significantly decreased when the  $\alpha$ IL-2 treatment started 3 or 5 days post-transfer (Figure 3E; data not shown). These findings support a critical role for IL-2 in the acquisition and maintenance of a Th-ctx phenotype in the adoptive transfer setting.

### Increased IL-2 Availability after Treg Cell Depletion Contributes to Shaping Th Cell Phenotype within Tumors

To determine whether our findings were relevant in the context of non-TCR transgenic T cells, we evaluated the role of IL-2 in the acquisition of cytotoxic activity by CD4<sup>+</sup> T cells in MCA205 sarcoma, which is known to respond to  $\alpha$ CTLA-4 monotherapy. To test whether IL-2 was necessary for the anti-tumor activity driven by  $\alpha$ CTLA-4, we inoculated WT mice with MCA205 and treated with  $\alpha$ CTLA-4 in the presence or absence of a neutralizing  $\alpha$ IL-2. In keeping with previous studies (Hannani et al., 2015), neutralization of IL-2 abolished the anti-tumor activity of  $\alpha$ CTLA-4. Furthermore, both CD4<sup>+</sup> and CD8<sup>+</sup> T cells were required for  $\alpha$ CTLA-4-mediated MCA205 tumor control (Figures 4A and 4B). To identify the role of IL-2 during  $\alpha$ CTLA-4-mediated CD4<sup>+</sup> T cell activation and differentiation, MCA205-bearing mice were treated as above, and tumor size was measured to ascertain the impact of the different treatments prior to assessment of CD4<sup>+</sup> T cell differentiation within tumors (Figure S4A). As IL-2 plays an important role in Treg cell homeostasis and function (Ye et al., 2018), we compared the number of Treg cells within the CD4<sup>+</sup> TIL compartment across all conditions.  $\alpha$ IL-2 treatment alone significantly reduced number of Treg cells in tumors, which was further decreased by  $\alpha$ CTLA-4, consistent with its Treg-

cell-depleting activity (Figure S4B). IL-2 neutralization slightly reduced the number of CD4<sup>eff</sup> TILs, whereas  $\alpha$ CTLA-4 treatment increased their numbers, giving a significantly increased Teff/Treg ratio only in  $\alpha$ CTLA-4- and  $\alpha$ CTLA-4- +  $\alpha$ IL-2-treated tumors (Figure 4C).

We assessed the expression and activation of IL-2 signaling pathway components in CD4<sup>+</sup> TILs and dLN cells in the MCA205 tumor model. The frequency of CD25- and CD122-expressing CD4<sup>+</sup> effector T cells was increased in  $\alpha$ CTLA-4 treated tumors. IL-2 neutralization reduced the proportion of CD25<sup>+</sup> CD4<sup>+</sup> T cells, but not the frequency of CD122-expressing CD4<sup>+</sup> T cells (Figure S4C). To determine if the increased percentage of CD25<sup>+</sup>CD4<sup>+</sup>eff TILs translated into an increased frequency of CD4<sup>eff</sup> cells with elevated IL-2 signaling, MCA205 TILs and lymph node (LN) cells were re-stimulated with IL-2, and phosphorylation of STAT5 was measured. An increase in STAT5 phosphorylation confirmed activation of the IL-2 pathway in CD4<sup>+</sup> effector TILs in both untreated and  $\alpha$ CTLA-4-treated tumors in comparison to CD4<sup>+</sup> T cells in the LN (Figure 4D). Further analysis of T cell activation markers revealed increased expression of CD69, CD44, GITR (Glucocorticoid-Induced TNFR-Related Protein) and CD38 upon  $\alpha$ CTLA-4 treatment, of which only GITR (McNamara et al., 2014) was decreased by IL-2 deprivation relative to controls. PD-1 expression was consistently increased and the negative co-stimulatory molecule CD101 decreased (Schey et al., 2016) in all  $\alpha$ CTLA-4 treated groups regardless of IL-2 presence (Figures 4E and S4D). The fraction of GzmB-expressing CD4<sup>+</sup> T cells was increased in the tumor following  $\alpha$ CTLA-4 treatment in accordance with the TCR transgenic data. When  $\alpha$ CTLA-4 was combined with  $\alpha$ IL-2, however, the GzmB levels in TILs decreased to the level of untreated mice (Figure 4F). In contrast, NK cells showed no significant change, and GzmB expression by T cells in the dLN was negligible (Figure S4E). As in the ACT models, activated CD4<sup>+</sup> T cells acquired a Th1-like phenotype, characterized by increased expression of T-bet and, in contrast to activated CD8<sup>+</sup> T cells, no Eomes (Figures 4G and S4F). Importantly, we found that Th-ctx CD4<sup>+</sup> T cells isolated from  $\alpha$ CTLA-4-treated MCA205 tumors were able to release GzmB when co-cultured with MCA205-loaded dendritic cells in a major histocompatibility complex class II (MHC class II)-dependent manner (Figures 4H and S4I). While IL-15 was able to increase GzmB expression by activated CD4<sup>+</sup> T cells *in vitro*, IL-15 neutralization *in vivo* in MCA205-bearing  $\alpha$ CTLA-4 treated mice had no impact on GzmB (Figure S4H). Thus IL-2 is critical for GzmB expression by endogenous tumor-infiltrating CD4<sup>+</sup> T cells with little impact on other features of CD4<sup>+</sup> T cell activation and differentiation in response to  $\alpha$ CTLA-4.

Representative plots of pSTAT5 expression in CD4<sup>+</sup> T cells and quantification of pSTAT5-expressing CD4<sup>eff</sup> T cells are shown (N = 5/group in two independent experiments). (E) Expression of GITR, CD69, and PD-1 by CD4<sup>eff</sup> TILs. Representative plots are shown with mean percentage of expression or mean fluorescence intensity (N = 5–10/group; two independent experiments). (F) Quantification of GzmB-expressing cells within CD4<sup>eff</sup> TILs and Treg TILs (N = 10/group in two independent experiments). (G) Quantification of GzmB-expressing cells within CD8 TILs and expression of Eomes and T-bet by CD4<sup>eff</sup> and CD8 TILs. Representative plots are shown with mean percentage of expression or mean fluorescent intensity (N = 10/group; two independent experiments). (H) dLN-infiltrating CD4<sup>+</sup> T cells were cultured unstimulated or stimulated with MCA205-pulsed dendritic cells (DCs) or empty (np) DCs on  $\alpha$ GzmB-coated ELISPOT plate for 24 h. Numbers represent GzmB spots per 10,000 responding CD4<sup>+</sup> T cells. Graphical representation and quantification are shown. (I) Immunohistochemical analysis of GzmB expression by CD4<sup>+</sup> T cells in human melanoma. Representative plots pre- and post-therapy are shown, with CD4 staining in brown, FOXP3 in green, and GZMB in blue. Quantification of CD4<sup>+</sup>GZMB<sup>+</sup> cells within tumor pre- and post-treatment and ratio of CD4<sup>eff</sup> to CD4<sup>+</sup> FOXP3<sup>+</sup> cells are shown (n = 10 patients, Wilcoxon matched-pairs signed rank test, one tailed). All other quantification plots show mean  $\pm$  SEM (one-way ANOVA).

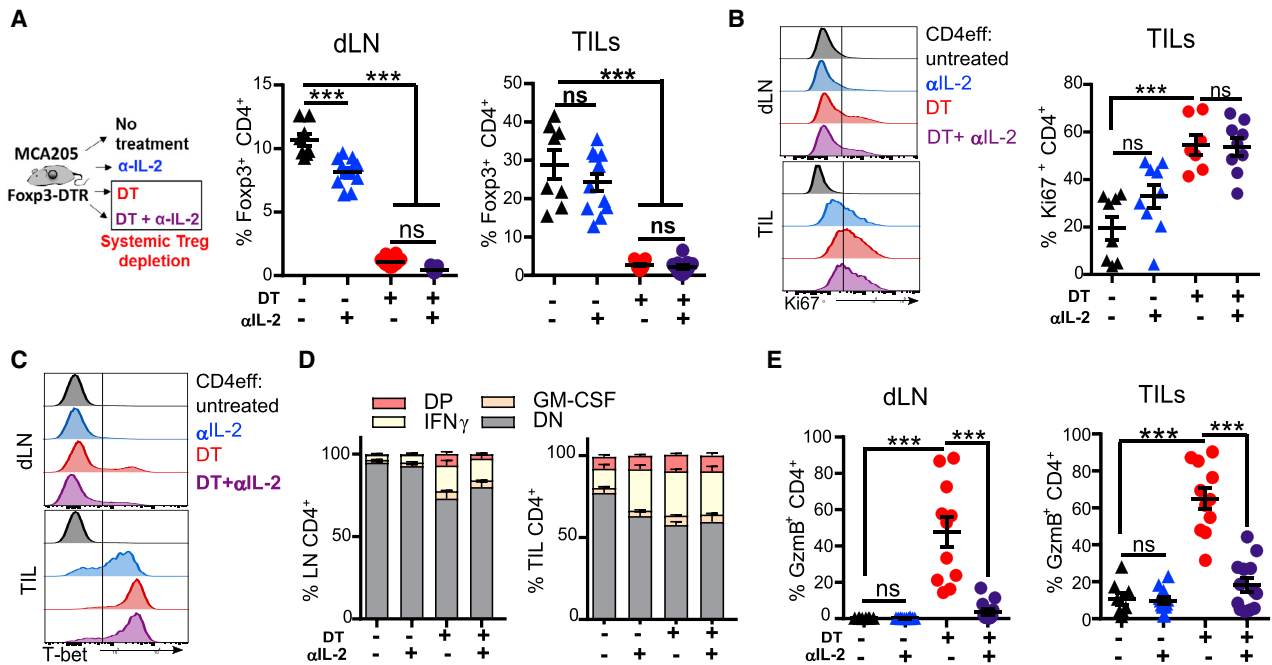

**Figure 5. Treg Cell Depletion in the Absence of CTLA-4 Blockade Drives GzmB Expression by CD4<sup>+</sup> T Cells**

(A–E) MCA205-bearing Foxp3<sup>DTR</sup> mice were treated with DT alone or in combination with  $\alpha$ IL-2 (schema in Figure S5F) from day 6 post-tumor inoculation. (A) Schema and quantification of Treg cells within CD4 T cells in dLNs and TILs (N = 10/group in two experiments). Expression of (B) Ki67 (C) T-bet by CD4 TILs (representative plots and quantification). (D) Quantification of CD4<sup>+</sup> IFN- $\gamma$ - and GM-CSF-expressing cells (N = 10/group in two experiments). (E) Quantification of CD4<sup>+</sup> GzmB-expressing cells within dLNs and TILs (N = 10/group in two experiments). All quantification plots show mean  $\pm$  SEM (one-way ANOVA).

We next sought to determine whether a similar relationship between Treg cell numbers and increased GzmB expression in CD4<sup>+</sup> T cells could be found in tumors from patients treated with  $\alpha$ CTLA-4. We used triple-color immunohistochemistry to evaluate Foxp3 and GzmB expression in CD4<sup>+</sup> TILs in patients with advanced melanoma prior to therapy and 3 weeks post-treatment with ipilimumab and melphalan. This model demonstrated clinical efficacy with a 10-fold increase in CD4<sup>+</sup> T cells on average in the tumor after treatment (Ariyan et al., 2018). We observed a significant increase in the number of GzmB<sup>+</sup>CD4<sup>+</sup> Foxp3<sup>-</sup> T cells post-therapy. Furthermore, a significant increase in the ratio of GzmB<sup>+</sup>CD4<sup>+</sup>Foxp3<sup>-</sup> to CD4<sup>+</sup> Foxp3<sup>+</sup> cells was also observed post-treatment (Figure 4I), suggesting an inverse relationship between Treg cell frequency and GzmB expression in tumor-infiltrating CD4<sup>+</sup> T cells. Together, the mouse and human data support a model in which Treg cells control acquisition of cytotoxic activity by tumor-infiltrating CD4<sup>+</sup> T cells.

### Treg Cell Depletion in the Absence of CTLA-4 Blockade Drives GzmB Expression by CD4<sup>+</sup> T Cells

To further explore the hypothesis that increased IL-2 availability is a crucial factor in the differentiation of CD4<sup>+</sup> Th-ctx cells after  $\alpha$ CTLA-4-mediated Treg cell depletion, we used Foxp3<sup>DTR</sup> mice to allow specific depletion of Treg cells without CTLA-4 blockade. We challenged Foxp3<sup>DTR</sup> mice with MCA205 tumors and treated them with diphtheria toxin (DT) with or without  $\alpha$ IL-2 (Figure S5A). In contrast to  $\alpha$ CTLA-4-mediated Treg depletion, which is tumor specific (Simpson et al., 2013), DT depletes

Treg cells systemically (Kim et al., 2007) (Figure 5A), promoting general activation of CD4<sup>+</sup> and CD8<sup>+</sup> T cells in both dLNs and tumors. Combining DT-mediated Treg cell depletion with  $\alpha$ IL-2 had little impact on Ki67 (Figures 5B and S5B), T-bet, IFN- $\gamma$ , and GM-CSF expression in CD4<sup>+</sup> T cells in either LN or tumor (Figures 5C, 5D, and S5C). Treg cell depletion promoted GzmB upregulation in TILs and draining LN T cells, which was abrogated (in CD4<sup>+</sup> and CD8<sup>+</sup> T cells) by IL-2 neutralization (Figures 5E and S5D). These data suggest that increased IL-2 as a consequence of a lower Treg cell to CD4<sup>+</sup>eff cell ratio is a key factor contributing to acquisition of a cytotoxic phenotype by CD4<sup>+</sup> T cells *in vivo*.

### In Vivo Acquisition of a Cytotoxic Phenotype by CD4<sup>+</sup> TILs and Tumor Rejection Are Independent of T-bet Expression

In all analyzed conditions, *in vitro* and *in vivo*, CD4<sup>+</sup>GzmB<sup>+</sup> T cells co-expressed the Th1 lineage-defining transcription factor T-bet. To investigate if T-bet had a dual role, controlling both Th1 and cytotoxic features of CD4<sup>+</sup> T cells, we inoculated *Tbx21*<sup>-/-</sup> and WT mice with MCA205 tumors followed by treatment with  $\alpha$ CTLA-4 alone or in combination with neutralizing  $\alpha$ IL-2. As expected,  $\alpha$ CTLA-4-mediated Treg cell depletion in *Tbx21*<sup>-/-</sup> mice failed to induce IFN- $\gamma$  expression (Figure 6A; data not shown). However, WT and T-bet-deficient CD4<sup>+</sup> and CD8<sup>+</sup> TILs exhibited equal levels of GzmB in  $\alpha$ CTLA-4 treated tumors (Figure 6B), suggesting that T-bet is not required for IL-2-mediated GzmB expression in CD4<sup>+</sup> TILs.

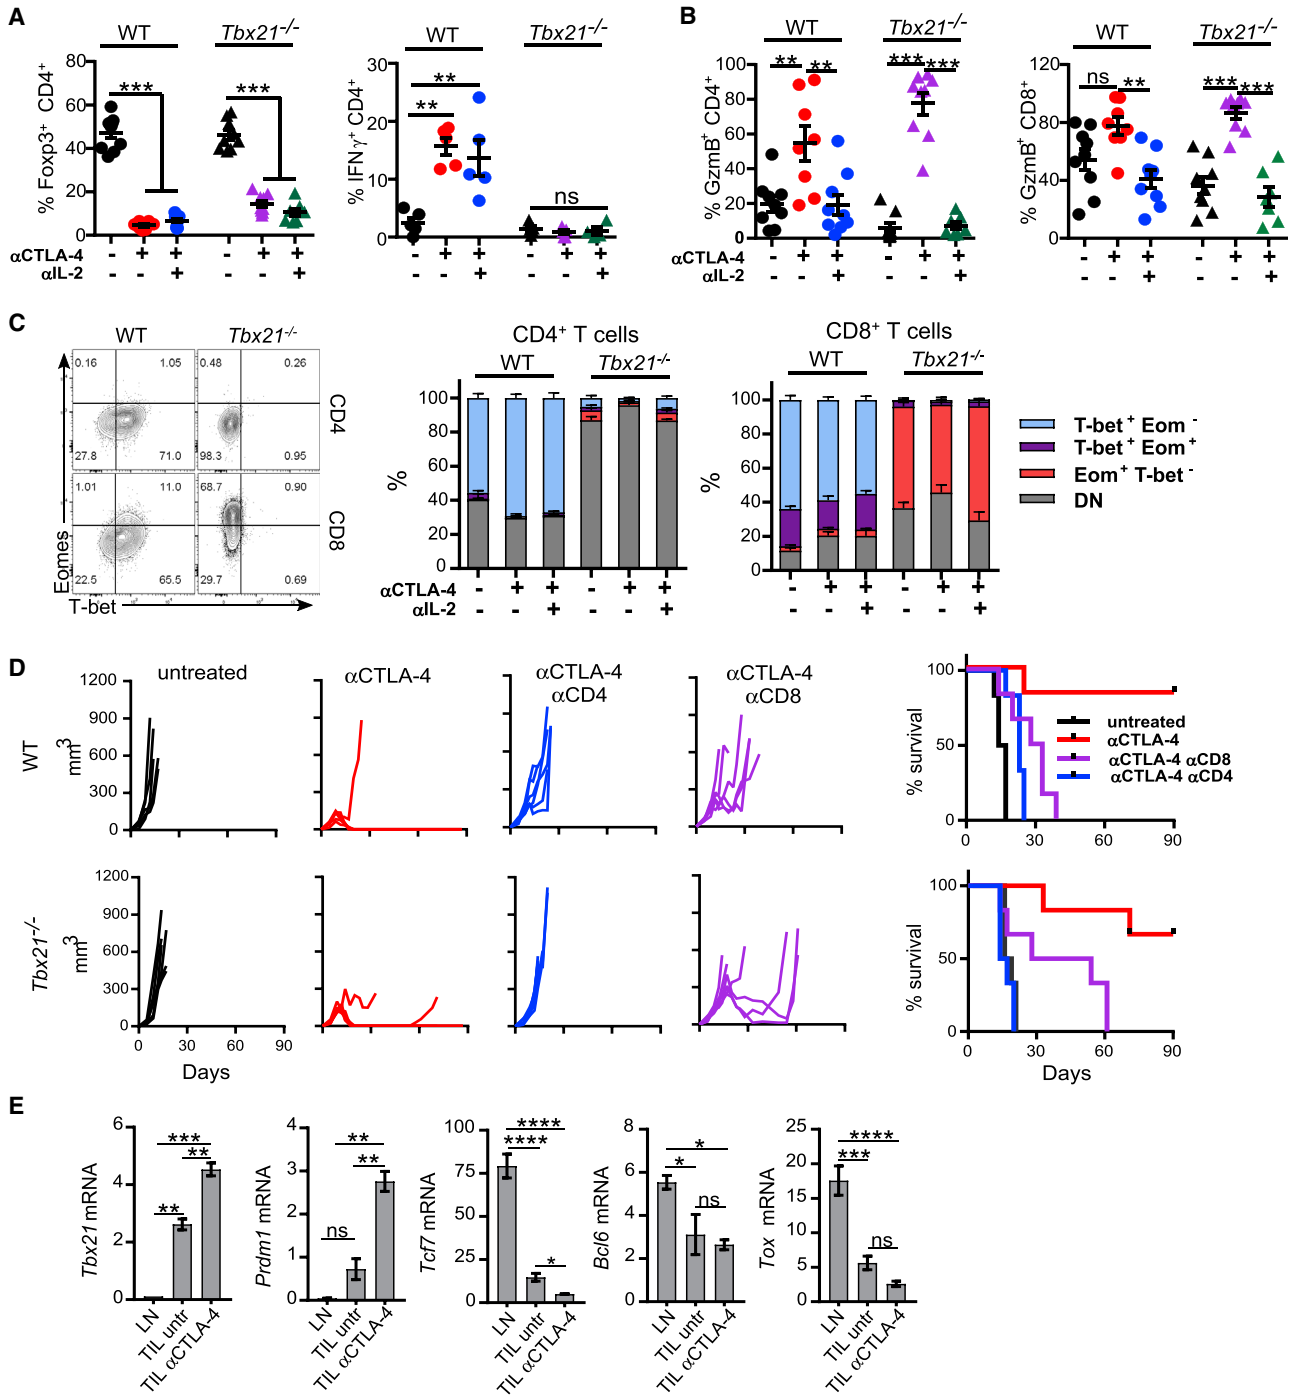

**Figure 6. T-bet Is Not Required for CTLA-4-Mediated Rejection of MCA205 Sarcoma**

(A–C) WT and *Tbx21*<sup>-/-</sup> MCA205-tumor-bearing mice were treated with αCTLA-4, αIL-2, or their combination. TILs and dLNs were isolated 13 days post-tumor inoculation for analysis of (A) Treg cells (N = 7–9/group in two independent experiments) and IFN-γ (N = 4–5/group) within CD4<sup>+</sup> TILs and (B) GzmB-expressing cells within CD4<sup>eff</sup> and CD8<sup>+</sup> TILs (N = 7–9/group in two independent experiments). (C) T-bet and Eomes expression by GzmB<sup>+</sup> CD4<sup>eff</sup> and CD8<sup>+</sup> TILs (N = 7–9/group in two experiments).

(D) Tumor growth and survival in WT and *Tbx21*<sup>-/-</sup> mice bearing MCA205 tumors and treated with αCTLA-4 alone or combined with depleting αCD8 or αCD4 antibodies on days 1, 3, 8, and 17 post-tumor implantation.

(E) qRT-PCR for transcription factors in purified MCA205 CD4<sup>+</sup>Foxp3<sup>-</sup> TILs and LNs at day 12 post-tumor inoculation (untreated versus αCTLA-4 treated mice). Results shown are expression relative to *Hprt1* expression using the 2<sup>-ΔΔC<sub>t</sub></sup> method (N = 6/condition).

All quantification plots show mean ± SEM (one-way ANOVA).

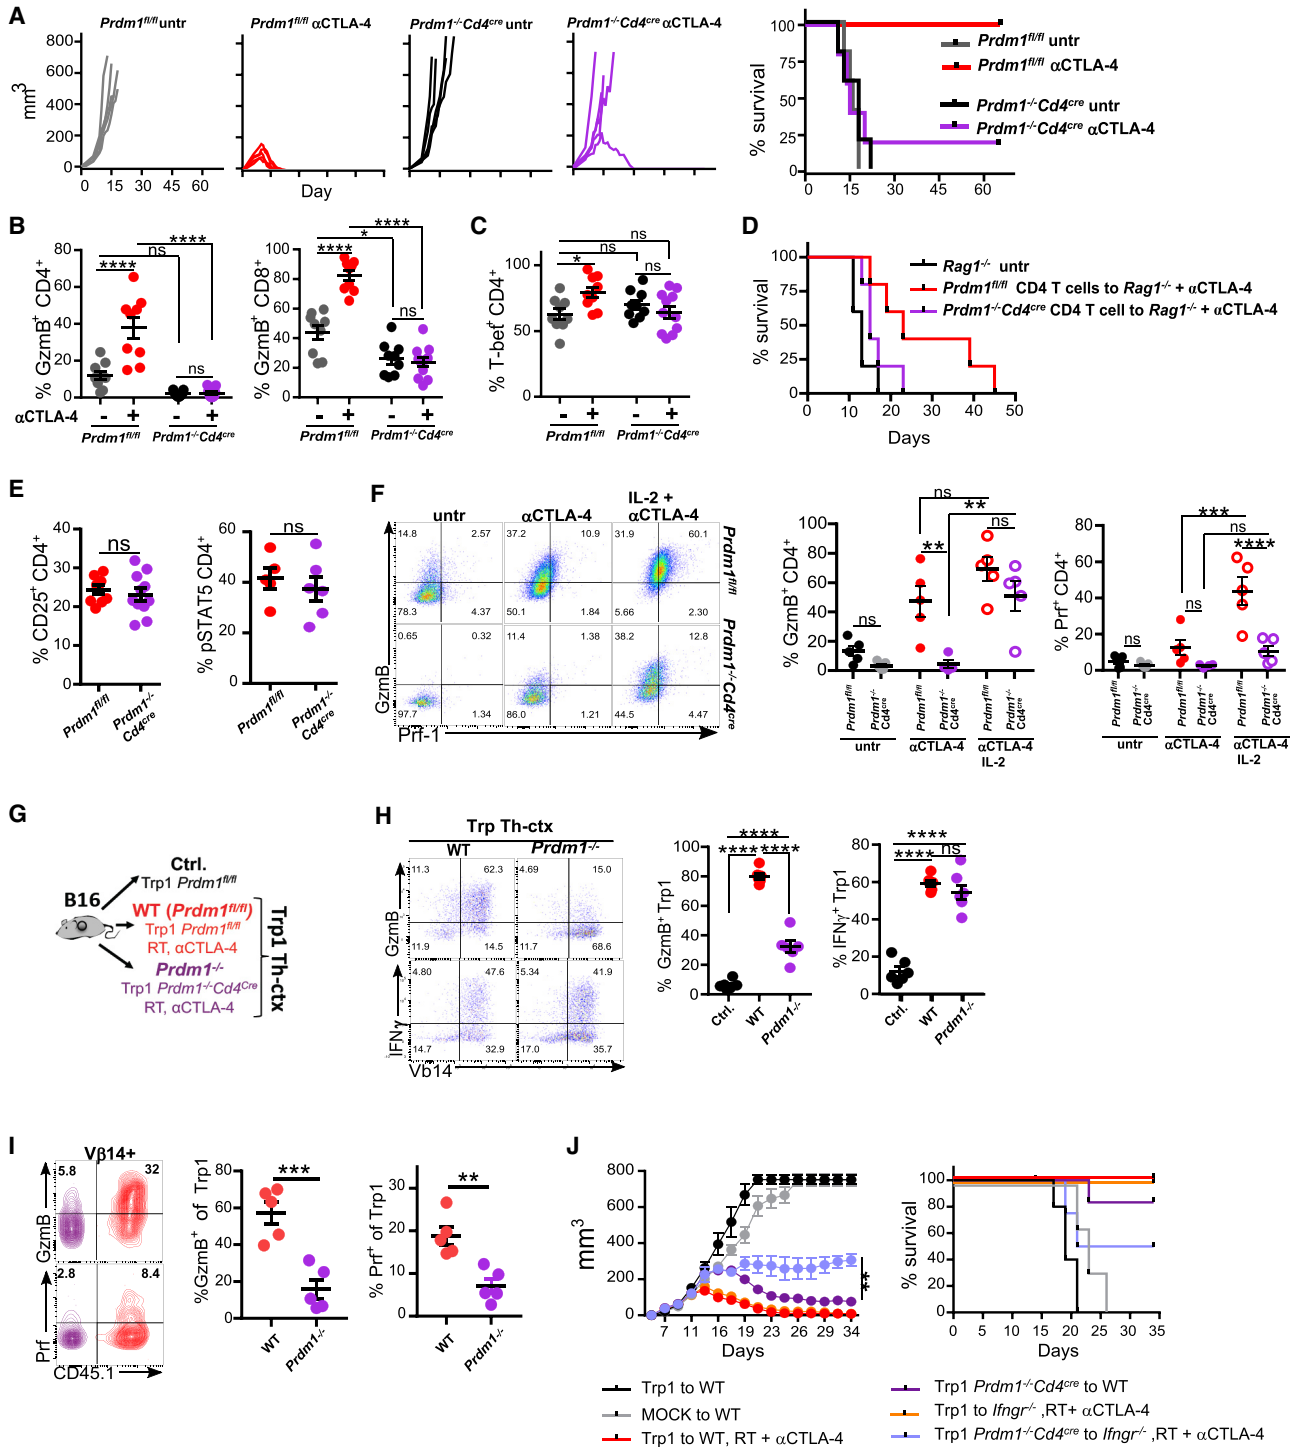

**Figure 7. IL-2 Controls Cytotoxic CD4<sup>+</sup> T Cell Differentiation in a Blimp-1-Dependent Manner**

(A) *Prdm1<sup>fl/fl</sup>* and *Prdm1<sup>-/-</sup>Cd4<sup>cre</sup>* mice bearing MCA205 tumors were treated or not with  $\alpha$ CTLA-4 and monitored for tumor growth and survival. (B and C) TILs and dLNs were isolated at day 12 post-tumor inoculation for quantification of (B) Gzmb-expressing cells within CD4<sup>eff</sup> and CD8 TILs and (C) T-bet-expressing cells within CD4<sup>eff</sup> and CD8 TILs (N = 9–11/group in two experiments). (D) Purified CD4<sup>+</sup> T cells from dLNs and tumors from MCA205-bearing *Prdm1<sup>fl/fl</sup>* and *Prdm1<sup>-/-</sup>Cd4<sup>cre</sup>* mice were transferred to MCA205-bearing *Rag1<sup>-/-</sup>* mice at day 3 post-inoculation followed by  $\alpha$ CTLA-4. Overall survival is shown (N = 5/group). (E) Quantification of CD25<sup>+</sup> and IL-2-stimulated pSTAT5-expressing CD4<sup>eff</sup> TILs (N = 5–11 group in two experiments). (F) *Prdm1<sup>fl/fl</sup>* and *Prdm1<sup>-/-</sup>Cd4<sup>cre</sup>* MCA205 tumor-bearing mice were treated with  $\alpha$ CTLA-4 alone or in combination with high-dose intratumoral IL-2. TILs and dLNs were isolated at day 12 post-tumor inoculation for quantification of Gzmb- and Prf1-expressing cells within CD4<sup>+</sup> TILs (N = 5/group).

(legend continued on next page)

The transcription factor Eomes can compensate for T-bet deficiency in CD4<sup>+</sup> T cells (Yang et al., 2008). To exclude this, we compared Eomes expression in WT and *Tbx21*<sup>-/-</sup> GzmB<sup>+</sup> TILs. In contrast to T-bet-deficient GzmB<sup>+</sup> CD8<sup>+</sup> T cells, which express high amount of Eomes, *Tbx21*<sup>-/-</sup> GzmB<sup>+</sup> CD4<sup>+</sup> T cells remained Eomes negative (Figure 6C), thus ruling out its potential involvement. To determine whether IFN- $\gamma$ <sup>-</sup> GzmB<sup>+</sup> CD4<sup>+</sup> T cells contribute to tumor control, WT and *Tbx21*<sup>-/-</sup> mice were inoculated with MCA205 tumors and treated with  $\alpha$ CTLA-4 (Figure 6D). Despite impaired IFN- $\gamma$  production by T cells, *Tbx21*<sup>-/-</sup> mice treated with  $\alpha$ CTLA-4 were able to reject tumors at a similar rate to WT animals. Depletion of either CD8<sup>+</sup> or CD4<sup>+</sup> T cells underscored the relative contribution of each compartments. Critically, *Tbx21*<sup>-/-</sup> mice depleted of CD8<sup>+</sup> T cell were still able to promote tumor regression in 50% of the cases, whereas CD4 depletion resulted in complete loss of tumor control (Figure 6D). T-bet-deficient CD4<sup>+</sup> T cells were able to control tumor growth even more effectively than WT CD4<sup>+</sup> T cells in CD8 T-cell-depleted mice, supporting the relevance of CD4<sup>+</sup>GzmB<sup>+</sup> T cells in tumor control induced by  $\alpha$ CTLA-4.

Last, we analyzed the expression of other transcription factors potentially involved with CD4 cytotoxic activity and previously identified on the Trp1 gene array. Consistent with the Trp1 data, polyclonal Th-ctx cells infiltrating  $\alpha$ CTLA-4-treated MCA205 tumors showed increased *Prdm1* and lower expression of *Tcf7* and *Tox* in CD4<sup>+</sup> T cells relative to CD4<sup>+</sup> TILs from untreated animals (Figure 6E). *Bcl6* expression was lower in TILs relative to LN CD4<sup>+</sup> T cells regardless of the treatment. Together, these data suggest the cytotoxic activity of CD4<sup>+</sup> TILs is independent of classical T-bet-dependent Th1 lineage programming.

### IL-2 Induces Cytotoxic CD4<sup>+</sup> T Cell Differentiation via Both Blimp-1-Dependent and Blimp-1-Independent Mechanisms

Considering T-bet does not appear regulate GzmB expression and the high levels of *Prdm1* mRNA observed in CD4<sup>+</sup> Th-ctx cells post- $\alpha$ CTLA-4 treatment, we explored whether Blimp-1 contributed to the acquisition of a cytotoxic phenotype by CD4<sup>+</sup> T cells and to the overall anti-tumor activity of  $\alpha$ CTLA-4. *Prdm1*<sup>-/-</sup>*Cd4*<sup>cre</sup> and control *Prdm1*<sup>fl/fl</sup> mice were inoculated with MCA205 cells and treated or not with  $\alpha$ CTLA-4. *Prdm1*<sup>-/-</sup>*Cd4*<sup>cre</sup> mice failed to control tumor growth after  $\alpha$ CTLA-4 (Figure 7A), suggesting a critical role for this transcription factor during anti-tumor immunity *in vivo*. Characterization of TILs showed impaired expression of GzmB by CD4<sup>+</sup>eff and Treg cells in Blimp-1-deficient mice treated with  $\alpha$ CTLA-4, whereas GzmB expression in CD8<sup>+</sup> T cells was only partially reduced (Figures 7B and S6A). T-bet expression was not altered by Blimp-1 dele-

tion in activated CD4<sup>+</sup> T cells (Figure 7C), suggesting the Th1 program does not require Blimp-1, while the cytotoxic program (in both CD4<sup>+</sup> and CD8<sup>+</sup> T cells) depends on Blimp-1, which is critical for tumor control. To evaluate the role of Blimp-1 on CD4-driven tumor control, we isolated CD4<sup>+</sup> TILs from MCA205 tumors and dLNs from  $\alpha$ CTLA-4-treated *Prdm1*<sup>fl/fl</sup> or *Prdm1*<sup>-/-</sup>*Cd4*<sup>cre</sup> mice and transferred them to MCA205-bearing *Rag1*<sup>-/-</sup> mice. Blimp-1-deficient CD4<sup>+</sup> T cells showed reduced tumor control compared to WT CD4<sup>+</sup> T cells (Figures 7D and S6B), supporting the relevance of Blimp-1 in CD4-mediated tumor control.

WT and Blimp-1-deficient CD4<sup>+</sup> TILs in  $\alpha$ CTLA-4-treated tumors exhibited equal levels of CD25 expression and STAT5 phosphorylation (Figure 7E), suggesting that failure to increase GzmB production was not due to deficient IL-2 signaling. To investigate the impact of IL-2 on GzmB expression by MCA205 TILs, *Prdm1*<sup>-/-</sup>*Cd4*<sup>cre</sup> and *Prdm1*<sup>fl/fl</sup> mice were inoculated with MCA205 cells and left untreated or treated with  $\alpha$ CTLA-4 alone or combined with high-dose intratumoral IL-2. IL-2 increased the fraction of GzmB<sup>+</sup> Blimp-1-deficient CD4<sup>+</sup> and CD8<sup>+</sup> TILs, but with a lower mean fluorescence intensity (MFI) than WT, suggesting lower expression per cell. Perforin expression by CD4<sup>+</sup> and CD8<sup>+</sup> TILs was not restored to WT levels on CD4<sup>+</sup> TILs (Figures 7F and S6C). These data support an additional, Blimp-1-independent mechanism for regulation of GzmB expression by IL-2.

We next investigated if Blimp-1 deficiency affected the generation and function of Trp1 Th-ctx cells described at the beginning of this study. Purified WT (*Prdm1*<sup>fl/fl</sup>) and Blimp-1-deficient (*Prdm1*<sup>-/-</sup>) CD4<sup>+</sup> T cells were transduced to express the Trp1  $\alpha$  and  $\beta$  TCR chains, with a mean transduction efficiency of 50% (data not shown). Trp1 WT and Blimp-1-deficient cells were transferred into B16-bearing mice with or without irradiation and  $\alpha$ CTLA-4. As a control, mock-transduced WT CD4<sup>+</sup> T cells were transferred into irradiated WT mice (Figures 7G and S6E). GzmB expression was reduced in *Prdm1*<sup>-/-</sup>Trp1 cells in comparison to WT Trp1 cells, but the proportion of Trp1 cells expressing TNF- $\alpha$ , T-bet, and IFN- $\gamma$  was not different between Blimp-1-deficient and WT Trp1 cells (Figures 7H and S6F). Consistent with previous reports, Blimp-1-deficient Trp1 cells produced more IL-2 upon re-stimulation (Martins et al., 2008) (Figure S6F). *Prdm1*<sup>-/-</sup>Trp1 cells contained fewer cells positive for CD69, Lag3, and OX-40 than WT Trp1 cells (Figure S6G). These data suggest that IL-2-mediated GzmB upregulation by CD4<sup>+</sup> T cells is, at least in part, regulated by Blimp-1 in the context of ACT. To control for the differences in the tumor microenvironment, we also co-transferred WT and *Prdm1*<sup>-/-</sup>Trp1 cells (ratio 1:1) to the same irradiated recipient. *Prdm1*<sup>-/-</sup>Trp1 cells exhibited lower levels of GzmB and Prf-1 than WT Trp1 cells, suggesting that the differences are intrinsic to Blimp-1-deficient cells (Figure 7I).

(G) Purified CD4<sup>+</sup> T cells from WT (*Prdm1*<sup>fl/fl</sup>) and *Prdm1*<sup>-/-</sup>*Cd4*<sup>cre</sup> mice were transduced with Trp1 TCR-expressing vector and transferred to B16-bearing mice alone or in combination with  $\alpha$ CTLA-4 + RT.

(H) Representative plots and quantification of GzmB- and IFN- $\gamma$ -expressing cells within Trp1 effector TILs (N = 6/group in two independent experiments).

(I) Transduced WT and Blimp-1-deficient Trp1 cells co-transferred 1:1 to the same host. Representative plots and quantification of GzmB- and Prf-1-expressing cells within Trp1 TILs are shown (N = 5/group).

(J) Transduced cells as in (H) were transferred at day 8 to B16-bearing WT or *Ifngr*<sup>-/-</sup> mice alone or in combination with  $\alpha$ CTLA-4 + RT. Cumulative tumor growth and survival are shown (N = 5/group).

All quantification plots show mean  $\pm$  SEM (one-way ANOVA) (J, two-way ANOVA).

To assess the anti-tumor activity of *Prdm1*<sup>-/-</sup> Trp1 Th-ctx cells, we transferred WT and *Prdm1*<sup>-/-</sup> Trp1 cells into irradiated WT or *Ifngr1*<sup>-/-</sup> B16-bearing recipients. We used *Ifngr1*<sup>-/-</sup> recipients to evaluate the role of Blimp-1 in a model with impaired helper activity of Trp1 Th-ctx cells, as these mice cannot respond to IFN- $\gamma$  produced by Trp1 Th-ctx cells. Mice treated with *Prdm1*<sup>-/-</sup> Trp1 cells, which produce less GzmB (Figure 7G), developed slightly larger tumors than those treated with WT Trp1 CD4<sup>+</sup> cells. Tumor growth was eventually controlled in mice receiving Blimp-1-deficient Trp1 cells, though these were not fully rejected, in contrast to WT Trp1 treated mice (Figures 7J and S6H). A significant decrease in tumor control was observed in *Ifngr1*<sup>-/-</sup> mice treated with *Prdm1*<sup>-/-</sup> Trp1 cells (Figures 7J and S6H), which is consistent with the data in Figure 1F and the idea that both helper and cytotoxic activities contribute to the potent anti-tumor activity of Trp1 cells in the context of ACTs. On average, 30% of Blimp-deficient Trp1 cells still expressed GzmB, potentially explaining the tumor control observed in 50% of *Ifngr1*<sup>-/-</sup> recipients treated with *Prdm1*<sup>-/-</sup> Trp1 cells. We were not able to extend these experiments beyond 34 days to evaluate tumor relapse, as *Prdm1*<sup>-/-</sup> CD4<sup>+</sup> T cells have been documented to promote systemic autoimmune toxicities (Martins et al., 2006). These data support Blimp-1-mediated control of the cytotoxic activity of Trp1 Th-ctx cells. Furthermore, both helper and lytic activity are vital to control tumor growth in the ACT setting.

## DISCUSSION

Here, we found CD4<sup>+</sup> T cells with polyfunctional helper and cytotoxic activity among TCR transgenic cells in models of adoptive transfer and within polyclonal CD4<sup>+</sup> T cell populations in the mouse fibrosarcoma and human melanoma tumor microenvironment. These cells expressed high amounts of T-bet and IFN- $\gamma$  and exhibited a Th1 phenotype but also produced the cytotoxic molecules GzmB and TNF- $\alpha$ . GzmB expression was independent of both T-bet and Eomes. Further analysis of the transcriptome of Trp1 Th-ctx cells revealed increased expression of *Prdm1* (Blimp-1) and several of its target genes (Bankoti et al., 2017). The transcriptome of activated CD4<sup>+</sup> TILs from  $\alpha$ CTLA-4-treated sarcoma showed a similar pattern of expression, marked by a decrease in the Tfh-cell-associated genes *Tcf7* and *Bcl6*. This transcriptional program of tumor-infiltrating CD4<sup>+</sup> Th-ctx cells was similar to that shown in viral-reactive CD4<sup>+</sup> GzmB<sup>+</sup> T cells (Donnarumma et al., 2016) but contrasts with prior studies showing T-bet-dependent differentiation of CD4<sup>+</sup> GzmB<sup>+</sup> in a viral model (Hua et al., 2013). Blimp-1 was critical not only to the expression of GzmB by CD4<sup>+</sup> T cells but also to  $\alpha$ CTLA-4-driven anti-tumor immunity, as Blimp-1-deficient T cells were unable to control MCA205 tumor growth when mice were treated with  $\alpha$ CTLA-4. Despite equivalent expression of T-bet and IFN- $\gamma$ , both Blimp-1-deficient CD4<sup>+</sup> and CD8<sup>+</sup> T cells failed to produce GzmB in response to  $\alpha$ CTLA-4, suggesting that Blimp-1 is a key factor controlling the *in vivo* differentiation of cytotoxic T cells following  $\alpha$ CTLA-4. Indeed, transfer of Blimp-1-deficient CD4<sup>+</sup> T cells into tumor-bearing Rag-1-deficient mice did not control MCA205 tumor growth to the same extent as transfer of WT CD4<sup>+</sup> T cells.

Our data also underscore the relevance and superior potency of CD4<sup>+</sup> T cells bearing a polyfunctional Th cell with predominant

Th1 activity and cytotoxic activity (Th-ctx). This is particularly relevant in ACT models, where loss of both perforin-1-mediated killing and sensitivity to IFN- $\gamma$  resulted in significantly reduced tumor control. While complete loss of tumor control was not demonstrated in *Ifngr1*<sup>-/-</sup> mice treated with *Prf1*<sup>-/-</sup> Trp1 cells, this may be due to previously reported Prf-1-independent, GzmB-dependent cytotoxicity (Boivin et al., 2009; Kurschus et al., 2004).

Our data highlight the central role of IL-2 in determining cell fate decisions within tumors. A deeper understanding of its impact in determining cellular phenotype and function may prove critical to optimization of current anti-cancer therapies and provide new opportunities to enhance them. IL-2 receptor signaling induces expression of Blimp-1 via STAT5, which is shown to oppose Tfh cell differentiation (DiToro et al., 2018; Johnston et al., 2009). Our findings suggest that this mechanism may orchestrate the differentiation of cytotoxic CD4<sup>+</sup> T cells within tumors following treatment with Treg-cell-depleting agents. IL-2 sequestration by Treg cells restricted the differentiation of CD4<sup>+</sup> Th-ctx cells *in vivo*. Our group and others previously demonstrated that maximal anti-tumor activity of  $\alpha$ CTLA-4 antibodies depends both on blockade of the CTLA-4 co-inhibitory molecule and on intra-tumoral depletion of Treg cells (Arce Vargas et al., 2018; Peggs et al., 2009; Selby et al., 2013; Simpson et al., 2013). Because fragment crystallizable receptor (FcR) co-engagement may be important for the action of  $\alpha$ CTLA-4 in addition to its Treg-cell-depleting activity (Waight et al., 2018), we extended our studies to include the Foxp3<sup>DTR</sup> model, investigating the impact of Treg cell depletion independently of CTLA-4-blockade or Fc $\gamma$ R co-engagement. GzmB expression was increased following Treg cell depletion and decreased following IL-2 neutralization in this model, suggesting that the increase in IL-2 amounts after Treg cell depletion is sufficient to drive differentiation of CD4<sup>+</sup> Th-ctx cells.

Blimp-1 deficiency did not impact GzmB expression in adoptively transferred Trp1 cells as much as in polyclonal endogenous CD4<sup>+</sup> TILs. This might be due to the higher availability of IL-2 in the adoptive T cell transfer model, resulting from Treg cell depletion and overall lymphodepletion driven by  $\alpha$ CTLA-4 treatment and irradiation, respectively. This is in addition to higher secretion of IL-2 by activated CD4<sup>+</sup> Trp1 cells, which could partially bypass Blimp-1 deficiency, as observed with the addition of exogenous IL-2 to MCA205 tumors in Blimp-1 deficient mice. IL-2 activates nuclear factor  $\kappa$ B (NF- $\kappa$ B) signaling, and NF- $\kappa$ B binding sites have been identified in both mouse and human *GzmB* promoters (Huang et al., 2006; Zhou and Meadows, 2003). Moreover, STAT5 can directly bind to *GzmB* promoter region (Verdeil et al., 2006), thus potentially explaining the ability of high-dose IL-2 to bypass Blimp-1 deficiency.

Our findings suggest that Treg cells control the acquisition of cytotoxic activity by CD4<sup>+</sup> T cells via competition for IL-2 availability. Furthermore, Blimp-1 and T-bet function as independent controllers of cytotoxic and helper activity in tumor-infiltrating CD4<sup>+</sup> T cells, and both of these activities are critical to maximal anti-tumor activity of polyfunctional CD4<sup>+</sup> Th-ctx cells. Our findings argue for the therapeutic potential of approaches focused on maximizing the impact on CD4<sup>+</sup> Th-ctx activity through manipulation of the Blimp-1/Bcl6 axis in tumor-reactive CD4<sup>+</sup> T cells.

## STAR★METHODS

Detailed methods are provided in the online version of this paper and include the following:

- **KEY RESOURCES TABLE**
- **LEAD CONTACT AND MATERIALS AVAILABILITY**
- **EXPERIMENTAL MODEL AND SUBJECT DETAILS**
  - Mice
  - Cell lines and tissue culture
  - Human Samples
- **METHOD DETAILS**
  - Tumor experiments
  - Adoptive T cell transfer
  - Adoptive transfer of Trp1 TCR transduced cells
  - Mouse tissue processing
  - Flow cytometry
  - Phospho-flow cytometry
  - Mouse T cells activation assays
  - Human T cells activation assays
  - Cytotoxicity assays
  - Granzyme B ELISPOT
  - Immunohistochemistry
  - Quantitative qPCR
  - Th-ctx and Th Trp1 transcriptome analysis
  - Software
- **QUANTIFICATION AND STATISTICAL ANALYSIS**
- **DATA AND CODE AVAILABILITY**

## SUPPLEMENTAL INFORMATION

Supplemental Information can be found online at <https://doi.org/10.1016/j.immuni.2019.12.007>.

## ACKNOWLEDGMENTS

We thank A. Georgiou, D. Zervas, J.Y. Henry, P. Levy, T. Clark, M. Werner Sunderland, E. Hatipoglu, and J. Clancy for technical expertise and W. Day for cell sorting. S.A.Q. is funded by a Cancer Research UK (CRUK) senior cancer research fellowship (C36463/A22246), a CRUK career development fellowship (536392/170773), and a CRUK biotherapeutic program grant (C36463/A20764). K.S.P. receives funding from the NIHR BTRU for Stem Cells and Immunotherapies (167097), of which he is the scientific director. This work was also supported by a Cancer Research Institute investigator award (S.A.Q.), a Worldwide Cancer Research grant (S.A.Q.), UCL/UCL Hospitals Biomedical Research Centre, the CRUK-UCL Centre (C416/A18088), the Cancer Immunotherapy Accelerator Award (CITA-CRUK) (C33499/A20265), Bloodwise (formerly Leukaemia and Lymphoma Research) (08022/P4664), the Department of Health, and CRUK funding schemes for NIHR BRC and Experimental Cancer Medicine Centres. M.V.M. was supported by a CRUK PhD studentship awarded to R.G.J. and S.A.Q. R.G.J. and G.M.L. were supported by an MRC grant (MR/R001413/1). T.K. was supported by the ERC (CoG 647215). The funders had no role in study design, data collection and analysis, decision to publish, or preparation of the article.

## AUTHOR CONTRIBUTIONS

S.A.Q., K.S.P., and A.S. contributed to study concept and design; A.S., M.V.d.M., K.B., I.S., M.A.V.M., F.A.V., D.F.D., A.H., A.U.A., and T.M. contributed to data acquisition; A.S., K.B., E.G., and M.O. contributed to data analysis and interpretation; M.P., H.S., B.S., T.K., G.K., C.E.A., and G.M.L. provided reagents; and A.S., M.V.d.M., R.G.J., S.A.Q., and K.S.P. contributed to manuscript preparation.

## DECLARATION OF INTERESTS

The authors declare no competing interests.

Received: November 27, 2018

Revised: September 30, 2019

Accepted: December 12, 2019

Published: January 7, 2020

## REFERENCES

- Akarca, A.U., Shende, V.H., Ramsay, A.D., Diss, T., Pane-Foix, M., Rizvi, H., Calaminici, M.R., Grogan, T.M., Linch, D., and Marafioti, T. (2013). BRAF V600E mutation-specific antibody, a sensitive diagnostic marker revealing minimal residual disease in hairy cell leukaemia. *Br. J. Haematol.* **162**, 848–851.
- Appay, V., Zaunders, J.J., Papagno, L., Sutton, J., Jaramillo, A., Waters, A., Easterbrook, P., Grey, P., Smith, D., McMichael, A.J., et al. (2002). Characterization of CD4(+) CTLs ex vivo. *J. Immunol.* **168**, 5954–5958.
- Arce Vargas, F., Furness, A.J.S., Litchfield, K., Joshi, K., Rosenthal, R., Ghorani, E., Solomon, I., Lesko, M.H., Ruef, N., Roddie, C., et al.; TRACERx Melanoma; TRACERx Renal; TRACERx Lung consortia (2018). Fc effector function contributes to the activity of human anti-CTLA-4 antibodies. *Cancer Cell* **33**, 649–663.e4.
- Ariyan, C.E., Brady, M.S., Siegelbaum, R.H., Hu, J., Bello, D.M., Rand, J., Fisher, C., Lefkowitz, R.A., Panageas, K.S., Pulitzer, M., et al. (2018). Robust antitumor responses result from local chemotherapy and CTLA-4 blockade. *Cancer Immunol. Res.* **6**, 189–200.
- Ballesteros-Tato, A., León, B., Graf, B.A., Moquin, A., Adams, P.S., Lund, F.E., and Randall, T.D. (2012). Interleukin-2 inhibits germinal center formation by limiting T follicular helper cell differentiation. *Immunity* **36**, 847–856.
- Bankoti, R., Ogawa, C., Nguyen, T., Emadi, L., Couse, M., Salehi, S., Fan, X., Dhall, D., Wang, Y., Brown, J., et al. (2017). Differential regulation of effector and regulatory T cell function by Blimp1. *Sci. Rep.* **7**, 12078.
- Boivin, W.A., Cooper, D.M., Hiebert, P.R., and Granville, D.J. (2009). Intracellular versus extracellular granzyme B in immunity and disease: challenging the dogma. *Lab. Invest.* **89**, 1195–1220.
- Brown, D.M., Kamperschroer, C., Dilzer, A.M., Roberts, D.M., and Swain, S.L. (2009). IL-2 and antigen dose differentially regulate perforin- and FasL-mediated cytolytic activity in antigen specific CD4+ T cells. *Cell. Immunol.* **257**, 69–79.
- Castro, I., Dee, M.J., and Malek, T.R. (2012). Transient enhanced IL-2R signaling early during priming rapidly amplifies development of functional CD8+ T effector-memory cells. *J. Immunol.* **189**, 4321–4330.
- Choi, Y.S., Gullicksrud, J.A., Xing, S., Zeng, Z., Shan, Q., Li, F., Love, P.E., Peng, W., Xue, H.H., and Crotty, S. (2015). LEF-1 and TCF-1 orchestrate T(FH) differentiation by regulating differentiation circuits upstream of the transcriptional repressor Bcl6. *Nat. Immunol.* **16**, 980–990.
- DiToro, D., Winstead, C.J., Pham, D., Witte, S., Andargachew, R., Singer, J.R., Wilson, C.G., Zindl, C.L., Luther, R.J., Silberger, D.J., et al. (2018). Differential IL-2 expression defines developmental fates of follicular versus nonfollicular helper T cells. *Science* **361**, eaao2933.
- Donnarumma, T., Young, G.R., Merckenschlager, J., Eksmond, U., Bongard, N., Nutt, S.L., Boyer, C., Dittmer, U., Le-Trilling, V.T.K., Trilling, M., et al. (2016). Opposing development of cytotoxic and follicular helper CD4 T cells controlled by the TCF-1-Bcl6 nexus. *Cell Rep.* **17**, 1571–1583.
- DuPage, M., and Bluestone, J.A. (2016). Harnessing the plasticity of CD4(+) T cells to treat immune-mediated disease. *Nat. Rev. Immunol.* **16**, 149–163.
- Evans, C.M., and Jenner, R.G. (2013). Transcription factor interplay in T helper cell differentiation. *Brief. Funct. Genomics* **12**, 499–511.
- Fu, S.H., Yeh, L.T., Chu, C.C., Yen, B.L.J., and Sytwu, H.K. (2017). New insights into Blimp-1 in T lymphocytes: a divergent regulator of cell destiny and effector function. *J. Biomed. Sci.* **24**, 49.
- Gerstberger, S., Hafner, M., and Tuschl, T. (2014). A census of human RNA-binding proteins. *Nat. Rev. Genet.* **15**, 829–845.

- Glimcher, L.H., Townsend, M.J., Sullivan, B.M., and Lord, G.M. (2004). Recent developments in the transcriptional regulation of cytolytic effector cells. *Nat. Rev. Immunol.* *4*, 900–911.
- Godec, J., Tan, Y., Liberzon, A., Tamayo, P., Bhattacharya, S., Butte, A.J., Mesirov, J.P., and Haining, W.N. (2016). Compendium of immune signatures identifies conserved and species-specific biology in response to inflammation. *Immunity* *44*, 194–206.
- Hannani, D., Vétizou, M., Enot, D., Rusakiewicz, S., Chaput, N., Klatzmann, D., Desbois, M., Jacquilot, N., Vimond, N., Chouaib, S., et al. (2015). Anticancer immunotherapy by CTLA-4 blockade: obligatory contribution of IL-2 receptors and negative prognostic impact of soluble CD25. *Cell Res.* *25*, 208–224.
- Hotblack, A. (2017). *Characterising the Role of Dendritic Cells in TCR Gene Therapy* (University College London).
- Hotblack, A., Holler, A., Piapi, A., Ward, S., Stauss, H.J., and Bennett, C.L. (2018). Tumor-resident dendritic cells and macrophages modulate the accumulation of TCR-engineered T cells in melanoma. *Mol. Ther.* *26*, 1471–1481.
- Hua, L., Yao, S., Pham, D., Jiang, L., Wright, J., Sawant, D., Dent, A.L., Braciale, T.J., Kaplan, M.H., and Sun, J. (2013). Cytokine-dependent induction of CD4<sup>+</sup> T cells with cytotoxic potential during influenza virus infection. *J. Virol.* *87*, 11884–11893.
- Huang, C., Bi, E., Hu, Y., Deng, W., Tian, Z., Dong, C., Hu, Y., and Sun, B. (2006). A novel NF- $\kappa$ B binding site controls human granzyme B gene transcription. *J. Immunol.* *176*, 4173–4181.
- Irizarry, R.A., Hobbs, B., Collin, F., Beazer-Barclay, Y.D., Antonellis, K.J., Scherf, U., and Speed, T.P. (2003). Exploration, normalization, and summaries of high density oligonucleotide array probe level data. *Biostatistics* *4*, 249–264.
- Janas, M.L., Groves, P., Kienzle, N., and Kelso, A. (2005). IL-2 regulates perforin and granzyme gene expression in CD8<sup>+</sup> T cells independently of its effects on survival and proliferation. *J. Immunol.* *175*, 8003–8010.
- Johnston, R.J., Poholek, A.C., DiToro, D., Yusuf, I., Eto, D., Barnett, B., Dent, A.L., Craft, J., and Crotty, S. (2009). Bcl6 and Blimp-1 are reciprocal and antagonistic regulators of T follicular helper cell differentiation. *Science* *325*, 1006–1010.
- Juno, J.A., van Bockel, D., Kent, S.J., Kelleher, A.D., Zaunders, J.J., and Munier, C.M.L. (2017). Cytotoxic CD4 T cells: friend or foe during viral infection? *Front. Immunol.* *8*, 19.
- Kägi, D., Ledermann, B., Bürki, K., Seiler, P., Odermatt, B., Olsen, K.J., Podack, E.R., Zinkernagel, R.M., and Hengartner, H. (1994). Cytotoxicity mediated by T cells and natural killer cells is greatly impaired in perforin-deficient mice. *Nature* *369*, 31–37.
- Kanhere, A., Hertweck, A., Bhatia, U., Gökmen, M.R., Perucha, E., Jackson, I., Lord, G.M., and Jenner, R.G. (2012). T-bet and GATA3 orchestrate Th1 and Th2 differentiation through lineage-specific targeting of distal regulatory elements. *Nat. Commun.* *3*, 1268.
- Kerkar, S.P., Sanchez-Perez, L., Yang, S., Borman, Z.A., Muranski, P., Ji, Y., Chinnasamy, D., Kaiser, A.D.M., Hinrichs, C.S., Klebanoff, C.A., et al. (2011). Genetic engineering of murine CD8<sup>+</sup> and CD4<sup>+</sup> T cells for preclinical adoptive immunotherapy studies. *J. Immunother.* *34*, 343–352.
- Kim, J.M., Rasmussen, J.P., and Rudensky, A.Y. (2007). Regulatory T cells prevent catastrophic autoimmunity throughout the lifespan of mice. *Nat. Immunol.* *8*, 191–197.
- Kitano, S., Tsuji, T., Liu, C., Hirschhorn-Cymerman, D., Kyi, C., Mu, Z., Allison, J.P., Gnjjatic, S., Yuan, J.D., and Wolchok, J.D. (2013). Enhancement of tumor-reactive cytotoxic CD4<sup>+</sup> T cell responses after ipilimumab treatment in four advanced melanoma patients. *Cancer Immunol. Res.* *1*, 235–244.
- Kurschus, F.C., Kleinschmidt, M., Fellows, E., Dornmair, K., Rudolph, R., Lillie, H., and Jenne, D.E. (2004). Killing of target cells by redirected granzyme B in the absence of perforin. *FEBS Lett.* *562*, 87–92.
- Lee, J.-Y., Skon, C.N., Lee, Y.J., Oh, S., Taylor, J.J., Malhotra, D., Jenkins, M.K., Rosenfeld, M.G., Hogquist, K.A., and Jameson, S.C. (2015). The transcription factor KLF2 restrains CD4<sup>+</sup> T follicular helper cell differentiation. *Immunity* *42*, 252–264.
- Li, Q., Rao, R.R., Araki, K., Pollizzi, K., Odunsi, K., Powell, J.D., and Shrikant, P.A. (2011). A central role for mTOR kinase in homeostatic proliferation induced CD8<sup>+</sup> T cell memory and tumor immunity. *Immunity* *34*, 541–553.
- Marafioti, T., Jones, M., Facchetti, F., Diss, T.C., Du, M.-Q., Isaacson, P.G., Pozzobon, M., Pileri, S.A., Strickson, A.J., Tan, S.-Y., et al. (2003). Phenotype and genotype of interfollicular large B cells, a subpopulation of lymphocytes often with dendritic morphology. *Blood* *102*, 2868–2876.
- Marafioti, T., Paterson, J.C., Ballabio, E., Reichard, K.K., Tedoldi, S., Hollowood, K., Dictor, M., Hansmann, M.-L., Pileri, S.A., Dyer, M.J., et al. (2008). Novel markers of normal and neoplastic human plasmacytoid dendritic cells. *Blood* *111*, 3778–3792.
- Marnik, E.A., Wang, X., Sproule, T.J., Park, G., Christianson, G.J., Lane-Reticker, S.K., Jain, S., Duffy, T., Wang, H., Carter, G.W., et al. (2017). Precocious interleukin 21 expression in naive mice identifies a natural helper cell population in autoimmune disease. *Cell Rep.* *27*, 208–221.
- Martins, G.A., Cimmino, L., Shapiro-Shelef, M., Szabolcs, M., Herron, A., Magnusdottir, E., and Calame, K. (2006). Transcriptional repressor Blimp-1 regulates T cell homeostasis and function. *Nat. Immunol.* *7*, 457–465.
- Martins, G.A., Cimmino, L., Liao, J., Magnusdottir, E., and Calame, K. (2008). Blimp-1 directly represses Il2 and the Il2 activator Fos, attenuating T cell proliferation and survival. *J. Exp. Med.* *205*, 1959–1965.
- McNamara, M.J., Kasiewicz, M.J., Linch, S.N., Dubay, C., and Redmond, W.L. (2014). Common gamma chain ( $\gamma$ c) cytokines differentially potentiate TNFR family signaling in antigen-activated. *J. Immunother. Cancer* *2*, 28.
- Mosmann, T.R., Cherwinski, H., Bond, M.W., Giedlin, M.A., and Coffman, R.L. (1986). Two types of murine helper T cell clone. I. Definition according to profiles of lymphokine activities and secreted proteins. *J. Immunol.* *136*, 2348–2357.
- Muranski, P., Boni, A., Antony, P.A., Cassard, L., Irvine, K.R., Kaiser, A., Paulos, C.M., Palmer, D.C., Touloukian, C.E., Ptak, K., et al. (2008). Tumor-specific Th17-polarized cells eradicate large established melanoma. *Blood* *112*, 362–373.
- Mustafa, A.S., and Godal, T. (1987). BCG induced CD4<sup>+</sup> cytotoxic T cells from BCG vaccinated healthy subjects: relation between cytotoxicity and suppression in vitro. *Clin. Exp. Immunol.* *69*, 255–262.
- Ottenhoff, T.H., Ab, B.K., Van Embden, J.D., Thole, J.E., and Kiessling, R. (1988). The recombinant 65-kD heat shock protein of *Mycobacterium bovis* Bacillus Calmette-Guérin/M. tuberculosis is a target molecule for CD4<sup>+</sup> cytotoxic T lymphocytes that lyse human monocytes. *J. Exp. Med.* *168*, 1947–1952.
- Peggs, K.S., Quezada, S.A., Chambers, C.A., Korman, A.J., and Allison, J.P. (2009). Blockade of CTLA-4 on both effector and regulatory T cell compartments contributes to the antitumor activity of anti-CTLA-4 antibodies. *J. Exp. Med.* *206*, 1717–1725.
- Quezada, S.A., Simpson, T.R., Peggs, K.S., Merghoub, T., Vider, J., Fan, X., Blasberg, R., Yagita, H., Muranski, P., Antony, P.A., et al. (2010). Tumor-reactive CD4<sup>+</sup> T cells develop cytotoxic activity and eradicate large established melanoma after transfer into lymphopenic hosts. *J. Exp. Med.* *207*, 637–650.
- Quezada, S.A., Peggs, K.S., Curran, M.A., and Allison, J.P. (2006). CTLA4 blockade and GM-CSF combination immunotherapy alters the intratumor balance of effector and regulatory T cells. *J. Clin. Invest.* *116*, 1935–1945.
- Sakaguchi, S., Yamaguchi, T., Nomura, T., and Ono, M. (2008). Regulatory T cells and immune tolerance. *Cell* *133*, 775–787.
- Schey, R., Dornhoff, H., Baier, J.L.C., Purtak, M., Opoka, R., Koller, A.K., Atreya, R., Rau, T.T., Daniel, C., Amann, K., et al. (2016). CD101 inhibits the expansion of colitogenic T cells. *Mucosal Immunol.* *9*, 1205–1217.
- Selby, M.J., Engelhardt, J.J., Quigley, M., Henning, K.A., Chen, T., Srinivasan, M., and Korman, A.J. (2013). Anti-CTLA-4 antibodies of IgG2a isotype enhance antitumor activity through reduction of intratumoral regulatory T cells. *Cancer Immunol. Res.* *1*, 32–42.
- Sergushichev, A. (2016). An algorithm for fast preranked gene set enrichment analysis using cumulative statistic calculation. *bioRxiv*. <https://doi.org/10.1101/060012>.



- Shapiro-Shelef, M., Lin, K.-I., McHeyzer-Williams, L.J., Liao, J., McHeyzer-Williams, M.G., and Calame, K. (2003). Blimp-1 is required for the formation of immunoglobulin secreting plasma cells and pre-plasma memory B cells. *Immunity* *19*, 607–620.
- Simpson, T.R., Li, F., Montalvo-Ortiz, W., Sepulveda, M.A., Bergerhoff, K., Arce, F., Roddie, C., Henry, J.Y., Yagita, H., Wolchok, J.D., et al. (2013). Fc-dependent depletion of tumor-infiltrating regulatory T cells co-defines the efficacy of anti-CTLA-4 therapy against melanoma. *J. Exp. Med.* *210*, 1695–1710.
- Smyth, G.K. (2004). Linear models and empirical bayes methods for assessing differential expression in microarray experiments. *Stat. Appl. Genet. Mol. Biol.* *3*, e3.
- Takeuchi, A., and Saito, T. (2017). CD4 CTL, a cytotoxic subset of CD4<sup>+</sup> T cells, their differentiation and function. *Front. Immunol.* *8*, 194.
- Tau, G., and Rothman, P. (1999). Biologic functions of the IFN-gamma receptors. *Allergy* *54*, 1233–1251.
- Tian, Y., Sette, A., and Weiskopf, D. (2016). Cytotoxic CD4 T cells: differentiation, function, and application to dengue virus infection. *Front. Immunol.* *7*, 531.
- Verdeil, G., Puthier, D., Nguyen, C., Schmitt-Verhulst, A.-M., and Auphan-Anezin, N. (2006). STAT5-mediated signals sustain a TCR-initiated gene expression program toward differentiation of CD8 T cell effectors. *J. Immunol.* *176*, 4834–4842.
- Waight, J.D., Chand, D., Dietrich, S., Gombos, R., Horn, T., Gonzalez, A.M., Manrique, M., Swiech, L., Morin, B., Brittsan, C., et al. (2018). Selective FcγR co-engagement on APCs modulates the activity of therapeutic antibodies targeting T cell antigens. *Cancer Cell* *33*, 1033–1047.e5.
- Williams, K.M., Hakim, F.T., and Gress, R.E. (2007). T cell immune reconstitution following lymphodepletion. *Semin. Immunol.* *19*, 318–330.
- Wu, T., Shin, H.M., Moseman, E.A., Ji, Y., Huang, B., Harly, C., Sen, J.M., Berg, L.J., Gattinoni, L., McGavern, D.B., and Schwartzberg, P.L. (2015). TCF1 is required for the T follicular helper cell response to viral infection. *Cell Rep.* *12*, 2099–2110.
- Xie, Y., Akpinarli, A., Maris, C., Hipkiss, E.L., Lane, M., Kwon, E.-K.M., Muranski, P., Restifo, N.P., and Antony, P.A. (2010). Naive tumor-specific CD4<sup>(+)</sup> T cells differentiated in vivo eradicate established melanoma. *J. Exp. Med.* *207*, 651–667.
- Yang, Y., Xu, J., Niu, Y., Bromberg, J.S., and Ding, Y. (2008). T-bet and eomesodermin play critical roles in directing T cell differentiation to Th1 versus Th17. *J. Immunol.* *181*, 8700–8710.
- Ye, C., Brand, D., and Zheng, S.G. (2018). Targeting IL-2: an unexpected effect in treating immunological diseases. *Signal Transduct. Target. Ther.* *3*, 2.
- Zhou, J., and Meadows, G.G. (2003). Alcohol consumption decreases IL-2-induced NF-kappaB activity in enriched NK cells from C57BL/6 mice. *Toxicol. Sci.* *73*, 72–79.
- Zhu, J., and Paul, W.E. (2010). Peripheral CD4<sup>+</sup> T-cell differentiation regulated by networks of cytokines and transcription factors. *Immunol. Rev.* *238*, 247–262.

## STAR★METHODS

## KEY RESOURCES TABLE

| REAGENT or RESOURCE                                                   | SOURCE         | IDENTIFIER                                                     |
|-----------------------------------------------------------------------|----------------|----------------------------------------------------------------|
| <b>Antibodies</b>                                                     |                |                                                                |
| Anti-mouse FoxP3-PE (FJL-16 s)                                        | ThermoFisher   | Cat#12-5773-82; <a href="#">RRID:AB_465936</a>                 |
| Anti-mouse FoxP3-eFluor450 (FJL-16 s)                                 | ThermoFisher   | Cat#48-5773-82; <a href="#">RRID: AB_1518812</a>               |
| Anti-mouse 4-1BB-biotin (17B-5)                                       | ThermoFisher   | <a href="#">Cat#13-1371</a> ; <a href="#">RRID:AB_466603</a>   |
| Anti-mouse CD3-PECy.7 (145-2C11)                                      | ThermoFisher   | <a href="#">Cat#25-0031</a> ; <a href="#">RRID:AB_469571</a>   |
| Anti-mouse CD3-BUV737 (17A2)                                          | BD Biosciences | Cat#564380; <a href="#">RRID: AB_2738781</a>                   |
| Anti-mouse CD4-BUV496 (GK1.5)                                         | ThermoFisher   | <a href="#">Cat#564667</a> ; <a href="#">RRID:AB_2722549</a>   |
| Anti-mouse CD45-BUV563 (30-F11)                                       | BD Biosciences | <a href="#">Cat#565710</a> ; <a href="#">RRID:AB_2722550</a>   |
| Anti-mouse CD5 (53-7.3)                                               | ThermoFisher   | <a href="#">Cat#45-0051</a> ; <a href="#">RRID:AB_914332</a>   |
| Anti-mouse CD8-BUV805 (53-6.7)                                        | BD Biosciences | <a href="#">Cat#564920</a> ; <a href="#">RRID:AB_2716856</a>   |
| Anti-mouse CD8-BV650 (53-6.7)                                         | ThermoFisher   | <a href="#">Cat#100742</a> ; <a href="#">RRID:AB_2563056</a>   |
| Anti-mouse CTLA-4-BV605 (UC10-4B9)                                    | ThermoFisher   | <a href="#">Cat#106323</a> ; <a href="#">RRID:AB_2566467</a>   |
| Granzyme B monoclonal antibody (GB11), APC                            | ThermoFisher   | Cat#GRB05; <a href="#">RRID: AB_2536539</a>                    |
| Anti-mouse GITR-eFluor450 (DTA-1)                                     | ThermoFisher   | Cat#48-5874; <a href="#">RRID:AB_1944395</a>                   |
| Anti-mouse CD25 BV510 (PC61)                                          | BioLegend      | Cat#102041; <a href="#">RRID: AB_2562269</a>                   |
| Anti-mouse Lag3 –BV650 (C9B7W)                                        | BioLegend      | Cat#125227; <a href="#">RRID: AB_2687209</a>                   |
| Anti-mouse CD69 – BN786 (H1.2F3)                                      | BD Biosciences | Cat#564683; <a href="#">RRID: AB_2738890</a>                   |
| Anti-mouse CD101-PE-Cy7 (Moushi101)                                   | ThermoFisher   | Cat#25-1011; <a href="#">RRID: AB_2573378</a>                  |
| Anti-mouse CD44-AF700 (IM7)                                           | ThermoFisher   | Cat#56-0441-80; <a href="#">RRID: AB_494012</a>                |
| Anti-mouse IL-2 –APC (JES6-5H4)                                       | ThermoFisher   | Cat#17-7021-82; <a href="#">RRID: AB_469490</a>                |
| Anti-mouse GM-CSF-PE (MP1-22E9)                                       | ThermoFisher   | Cat# 12-7331-82; <a href="#">RRID: AB_466205</a>               |
| Anti-mouse TNFa –PE-Cy7 (MP6-XT22)                                    | BioLegend      | Cat# 506323; <a href="#">RRID: AB_2204356</a>                  |
| Anti-mouse CD45- BUV563 (30-F11)                                      | BD Biosciences | Cat# 565710; <a href="#">RRID: AB_2722550</a>                  |
| Anti-mouse IFN $\gamma$ -AlexaFluor488 (XMG1.2)                       | BioLegend      | <a href="#">Cat#505813</a> ; <a href="#">RRID:AB_493312</a>    |
| Anti-mouse Ki67-eFluor450 (SolA15)                                    | ThermoFisher   | <a href="#">Cat#48-5698</a> ; <a href="#">RRID:AB_11151155</a> |
| Anti-mouse NK1.1-eFluor450 (PK136)                                    | ThermoFisher   | <a href="#">Cat#48-5941</a> ; <a href="#">RRID:AB_2043877</a>  |
| Anti-NK1.1-AlexaFluor700 (PK136)                                      | ThermoFisher   | <a href="#">Cat#56-5941</a> ; <a href="#">RRID:AB_2574505</a>  |
| Anti-mouse PD-1-PE-Dazzle594 (29F.1A12)                               | BioLegend      | Cat#135228; <a href="#">RRID: AB_2566006</a>                   |
| Anti-mouse Prf-1 PE (S16009B)                                         | BioLegend      | Cat#135228; <a href="#">RRID: AB_2721640</a>                   |
| Anti-mouse IL-2-APC (JES6-5H4)                                        | ThermoFisher   | Cat#17-7021-82; <a href="#">RRID: AB_469490</a>                |
| Anti-human CD4-AlexaFluor700 (OKT4)                                   | ThermoFisher   | Cat#56-0048; <a href="#">RRID: AB_914326</a>                   |
| Anti-mouse CD38 –FITC (90)                                            | ThermoFisher   | Cat#11-0381-81; <a href="#">RRID: AB_465023</a>                |
| Anti-mouse T-bet-PE (4B10)                                            | BioLegend      | Cat# 644810; <a href="#">RRID: AB_2200542</a>                  |
| Anti-human Foxp3-PE (PCH101)                                          | ThermoFisher   | Cat#12-4776; <a href="#">RRID: AB_1518782</a>                  |
| Anti-CTLA-4 9H10                                                      | BioXcell       | BE0131                                                         |
| Anti-IL-2 (JES6-1A12)                                                 | BioXcell       | BE0043                                                         |
| Anti-IL-15 (AIO.3)                                                    | BioXcell       | BE0315                                                         |
| <b>Biological Samples</b>                                             |                |                                                                |
| Tissue sections of formalin-fixed and paraffin-embedded tumor samples | MSKCC          | N/A                                                            |
| <b>Chemicals, Peptides, and Recombinant Proteins</b>                  |                |                                                                |
| Ionomycin                                                             | Sigma          | Cat#I0634                                                      |
| Streptavidin-BV650                                                    | BioLegend      | Cat#405232                                                     |
| Streptavidin-BV711                                                    | BioLegend      | Cat#405241                                                     |
| Viability dye eFluor780                                               | ThermoFisher   | Cat#65-0856                                                    |

(Continued on next page)

**Continued**

| REAGENT or RESOURCE                                        | SOURCE                                                                        | IDENTIFIER             |
|------------------------------------------------------------|-------------------------------------------------------------------------------|------------------------|
| Phorbol 12-myristate 13-acetate (PMA)                      | Sigma                                                                         | Cat#P8139              |
| OVA <sub>323-339</sub> (ISQAVHAAHAEINEAGR) peptide         | Pepscan                                                                       | Custom synthesis       |
| Trp1 <sub>106-130</sub> (GHNCGTCRPGWRGAACNQKILTVR) peptide | Pepscan                                                                       | Custom synthesis       |
| <b>Critical Commercial Assays</b>                          |                                                                               |                        |
| CellTrace CFSE cell proliferation kit                      | ThermoFisher                                                                  | Cat#C34554             |
| CellTrace Violet cell proliferation kit                    | ThermoFisher                                                                  | Cat#C34557             |
| Fixation/Permeabilization solution kit                     | BD Biosciences                                                                | Cat#554714             |
| FoxP3/Transcription Factor Staining Buffer Set             | ThermoFisher                                                                  | Cat#00-5523            |
| Liberase TL                                                | Roche                                                                         | Cat#05401020001        |
| Recombinant DNase I                                        | Roche                                                                         | Cat#000000004716728001 |
| Mouse GzmB ELISPOT                                         | R&D                                                                           | Cat#EL1865             |
| Mouse CD4 Beads (L3T4)                                     | Miltenyi                                                                      | 130-117-043            |
| GranToxiLux                                                | Oncolmmunin                                                                   | Cat#GTL7028            |
| <b>Deposited Data</b>                                      |                                                                               |                        |
| Microarray dataset                                         | This study                                                                    | GEO: GSE141540         |
| <b>Experimental Models: Cell Lines</b>                     |                                                                               |                        |
| B16                                                        | ATCC                                                                          | CRL-6323               |
| B16-OVA                                                    | MSKCC                                                                         | N/A                    |
| MCA205                                                     | Gift from L. Galluzzi                                                         | N/A                    |
| <b>Experimental Models: Organisms/Strains</b>              |                                                                               |                        |
| Mice: C57BL/6                                              | Charles River Laboratories                                                    | Cat# 027               |
| Mice: <i>Tbx21</i> <sup>-/-</sup>                          | Gift from G. Lord (KCL)                                                       | N/A                    |
| Mice: <i>Prdm1</i> <sup>fl/fl</sup>                        | Gift from T. Korn (TUM)                                                       | N/A                    |
| Mice: <i>Cd4</i> <sup>cre</sup>                            | Gift from B.Seddon (UCL)                                                      | N/A                    |
| Mice: Trp1                                                 | <a href="#">Muranski et al., 2008</a> ; <a href="#">Quezada et al., 2010</a>  | N/A                    |
| Mice: Trp1 <i>Prf1</i> <sup>-/-</sup>                      | <a href="#">Quezada et al., 2010</a>                                          | N/A                    |
| Mice: <i>Ifngr1</i> <sup>-/-</sup>                         | Gift from G. Kassiotis (The Crick)                                            | N/A                    |
| Mice: <i>Rag1</i> <sup>-/-</sup>                           | Gift from G. Kassiotis (The Crick)                                            | N/A                    |
| Mice: OT II                                                | Charles River                                                                 | Cat# 643               |
| <b>Oligonucleotides</b>                                    |                                                                               |                        |
| qPCR primers                                               | This study                                                                    | N/A                    |
| <b>Recombinant DNA</b>                                     |                                                                               |                        |
| retroviral vector pMP71                                    | <a href="#">Hotblack, 2017</a>                                                | N/A                    |
| <b>Software and Algorithms</b>                             |                                                                               |                        |
| FlowJo 10.0.8                                              | Tree Star                                                                     | N/A                    |
| R                                                          | Cran                                                                          | R-project              |
| Prism v6 and v7                                            | GraphPad Software                                                             | N/A                    |
| QuPath v.0.1.2                                             | Open Source <a href="https://qupath.github.io/">https://qupath.github.io/</a> | N/A                    |

**LEAD CONTACT AND MATERIALS AVAILABILITY**

Inquires for further information or requests for resources and reagents should be directed and will be fulfilled by the lead contact Sergio A. Quezada ([s.quezada@ucl.ac.uk](mailto:s.quezada@ucl.ac.uk)). This study did not generate new unique reagents.

**EXPERIMENTAL MODEL AND SUBJECT DETAILS****Mice**

C57BL/6 mice were purchased from Charles River Laboratories, UK. *Tbx21*<sup>-/-</sup> mice were a kind gift from G. Lord (King's College, London, UK), *Cd4*<sup>cre</sup> from B. Seddon (UCL, UK), *Prdm1*<sup>fl/fl</sup> mice ([Shapiro-Shelef et al., 2003](#)) from T. Korn (TUM, Munich, Germany),

*Rag1*<sup>-/-</sup> and *Ifngr1*<sup>-/-</sup> mice from G. Kassiotis (The Crick Institute, London, UK). Trp1 mice carry the following mutation: *Rag1*<sup>tm1Mom</sup> x *Tyrb1*<sup>B-w</sup> x *CD45.1*<sup>+/+</sup> (Muranski et al., 2008; Quezada et al., 2010). Trp1 *Prf1*<sup>-/-</sup> additionally carry the following mutation: *Prf1*<sup>tm1Sdz</sup>. All transgenic mice were of C57BL/6 background, bred in Charles River Laboratories (Trp1, Trp1 x *Prf1*<sup>-/-</sup>, OT-II-*CD45.1*<sup>+/+</sup>, *Tbx21*<sup>-/-</sup>) or University College London (*Prdm1*<sup>fl/fl</sup> *Cd4*<sup>cre</sup>) animal facilities. Mice were 6 to 10 weeks old and age- and sex-matched within experiments. For adoptive transfer experiments with Trp1 and Trp1x*Prf1*<sup>-/-</sup> cells C57BL/6J 5-7 weeks old male mice were used. All animal studies were performed under University College London and UK Home Office ethical approval and regulations.

### Cell lines and tissue culture

MCA205 sarcoma tumor cells (gift from L. Galluzzi) were cultured in DMEM (Sigma) supplemented with 10% fetal bovine serum (FBS, GIBCO Sigma), 100 U/mL penicillin, 100 µg/mL streptomycin and 2 mM L-glutamine (all from GIBCO). B16-F1 (ATCC, CRL-6323) and B16-OVA cells were cultured in RPMI1640 media supplemented as above. Tumor cell lines were routinely tested and shown to be free of Mycoplasma contamination.

### Human Samples

Presented human data derives from the phase II trial of systemic ipilimumab in combination with local melphalan for patients with in-transit melanoma ([clinicaltrials.gov](http://clinicaltrials.gov); NCT01323517; Ethics: IRB#10-101, MSKCC) included patients with unresectable stage IIIB-IV melanoma with recurrent melanoma. Patients were treated with melphalan and Ipilimumab (10 mg/kg x 4 doses, starting from days 7 to 21 after isolated limb infusion) as described (Ariyan et al., 2018). Research biopsies were taken just prior to limb infusion, after limb infusion (7–15 days), and 3 weeks after the last dose of Ipilimumab. Patients demographic can be found in (Ariyan et al., 2018). Tissue sections of formalin-fixed and paraffin-embedded tumor samples were provided by C.E. Ariyan (MSKCC).

## METHOD DETAILS

### Tumor experiments

6-8 weeks old C57BL/6, *Foxp3*<sup>DTR</sup>, *Tbx21*<sup>-/-</sup>, *Prdm1*<sup>-/-</sup> *Cd4*<sup>cre</sup> or *Prdm1*<sup>fl/fl</sup> mice were injected subcutaneously with  $4 \times 10^5$  MCA205 cells re-suspended in PBS. If not indicated otherwise MCA205-bearing mice were treated with 100 µg αCTLA-4 (clone 9H10, BioXcell) at days 6,9 and 12 post tumor inoculation. For treatment of *Tbx21*<sup>-/-</sup> mice αCTLA-4 clone 4F10-IgG2a (Evitria) was used. For cytokine neutralizing αIL-2, αIL-15 or αIL-7 (200 µg) administration started at day 6 following 2 additional doses. IL-2 (Peprotech) was administered intratumorally and day 6, 8 and 10 at the dose of 4000 IU. Therapeutic antibodies: αCTLA-4 (9H10), αCD4 (GK1.5) and αCD8 (2.43), αIL-2 (JES-6-1A12), αMHC-II (M5/114), αIL-15 (AIO.3) and αIL-7 (M25) were purchased from BioXcell. Tumors were measured at least twice weekly and mice were euthanized when any orthogonal tumor diameter reached 150 mm. Tumor volume was calculated as  $4/3\pi abc$ , where a, b, and c are radii.

### Adoptive T cell transfer

C57BL/6 or *Ifgr1*<sup>-/-</sup> mice were injected subcutaneously with  $2.5 \times 10^5$  B16,  $2.5 \times 10^5$  B16-OVA cells re-suspended in PBS. For adoptive cell transfer experiments melanoma-bearing mice were treated or not with 5 Gy of body irradiation followed by adoptive transfer of transgenic T cells. Trp1, Trp1x*Prf1*<sup>-/-</sup> or OT-II cells were isolated from spleen and LN of naive Trp1, Trp1x*Prf1*<sup>-/-</sup> or OT-II mice on the day of adoptive transfer, respectively and purified with CD4<sup>+</sup> beads (130-117-043, Miltenyi) according to the manufacturer's protocol.  $0.6 \times 10^5$  Trp1;  $0.6 \times 10^5$  Trp1x*Prf1*<sup>-/-</sup> or  $3 \times 10^5$  OT-II cells were re-suspended in PBS administered intravenously. Mice were treated or not with 200 µg αCTLA-4 i.p on day 8 and 100 µg αCTLA-4 on days 11 and 14. Cytokine neutralizing antibodies were administered at the time points indicated in Figures S1, S2, and S3. Mice in Th conditions received 10<sup>6</sup> of irradiated (150 Gy) GVAX cells (GM-CSF-expressing B16 cells).

*Rag1*<sup>-/-</sup> mice were injected subcutaneously with  $3 \times 10^5$  MCA205 cells re-suspended in PBS. Mice received polyclonal Blimp-1-sufficient or Blimp-1-deficient CD4<sup>+</sup> T cells. Polyclonal CD4<sup>+</sup> TILs and dLN cells were isolated from TILs and dLN of αCTLA-4-treated mice at day 11 post tumor inoculation and purified with CD4<sup>+</sup> beads (130-117-043, Miltenyi) and incubated with αCD8 (50 µg) for 30 minutes at for CD8<sup>+</sup> T cell depletion. Tumor-bearing *Rag1*<sup>-/-</sup> recipients were not irradiated. For cytokine neutralizing in adoptive transfer setting αIL-2 or αIL-7 (200 µg) administration started at day 11 following 2 additional doses. Tumors were measured at least three times weekly and mice were euthanized when any orthogonal tumor diameter reached 150 mm. Tumor volume was calculated as  $4/3\pi abc$ , where a, b, and c are radii.

### Adoptive transfer of Trp1 TCR transduced cells

The transduction procedure was performed according to (Hotblack et al., 2018). Briefly, the TRP1 TCR (Kerker et al., 2011; Muranski et al., 2008) was cloned into the retroviral vector pMP71 with a 2A sequence separating the Vα3.2 and Vβ14 chains, followed by an internal ribosome entry site (IRES) truncated CD19 sequence. The TCR was codon optimized and also contains an extra cysteine residue in the constant chains to enhance pairing of the α and β chains (Hotblack, 2017). To generate TRP1 retroviral particles, Phoenix-Eco (PhEco)-adherent packaging cells (Nolan Laboratory) were transiently transfected with retroviral vectors for the generation of supernatant containing the recombinant retrovirus required for infection of target cells, as described previously. The PhEco-adherent packaging cells were transfected using Genejuice (Merck) with the pCL-eco construct and the TRP1 TCR vector according to the manufacturers' instructions. *Prdm1*<sup>fl/fl</sup> or *Prdm1*<sup>-/-</sup> *Cd4*<sup>cre</sup> CD4<sup>+</sup> T cells were purified by magnetic selection

according to the manufacturer's instructions (Miltenyi). Sorted cells were activated with concanavalin (Con) A (2  $\mu\text{g}/\text{mL}$ ) and IL-7 (1 ng/mL) for 24 h, and then  $2 \times 10^6$  activated T cells were incubated for a further 72 h with retroviral particles on retronectin-coated (Takara-Bio) 24-well plates, in the presence of IL-2 (100 U/mL; Roche). Cells were stained with anti-TCR Vb14 antibody to confirm transduction efficiency. Transduced cells were administered intravenously into melanoma-bearing mice 72 h after transduction. The recipient mice were treated with therapeutic antibodies at the time points indicated at [Figure S6E](#). Tumors were measured at least three times weekly and mice were euthanized when any orthogonal tumor diameter reached 150 mm. Tumor volume was calculated as  $4/3\pi abc$ , where a, b, and c are radii.

### Mouse tissue processing

Mice used for functional experiments were sacrificed on day 13 (MCA205) or 17/18 (melanoma) after tumor implantation, and LN cells and tumor-infiltrating lymphocytes were isolated as previously described ([Quezada et al., 2006](#); [Simpson et al., 2013](#)). Briefly, lymph nodes and tumors were dissected into RPMI medium. Lymph nodes were dispersed through a 70- $\mu\text{m}$  filter whereas tumors were mechanically disrupted using scissors, digested with a mixture of 0.33 mg/ml DNase (Sigma-Aldrich) and 0.27 mg/ml Liberase TL (Roche) in serum-free RPMI for 30 min at 37°C, and dispersed through a 70- $\mu\text{m}$  filter. Cells were either re-suspended in FACS buffer (PBS with 2% FBS and 2 mM EDTA), re-stimulated with cognate antigen, stimulated with PMA and Ionomycin or further cell type-specific purification was performed. Tumor-infiltrating CD4<sup>+</sup> T cells were purified using CD4 positive selection (FlowComp; Invitrogen) according to the manufacturer's instructions. Purified CD4<sup>+</sup> T cells from tumors or bulk cells from LNs were restimulated for 4 h at 37°C with  $5 \times 10^4$  DCs and 1  $\mu\text{M}$  of Trp1 or OVA peptide followed by addition of brefeldin A (BD) for 2 more hours. Polyclonal CD4<sup>+</sup> T cells were restimulated with phorbol 12-myristate 13-acetate (PMA, 20 ng/mL) and ionomycin (500 ng/mL; Sigma Aldrich) for 4 hours at 37°C in the presence of GolgiPlug (BD Biosciences).

### Flow cytometry

Directly conjugated antibodies employed for flow cytometry are listed in Key Resource Table. Surface staining was performed at 4°C with antibodies re-suspended in PBS with 2% FBS and 2 mM EDTA. Staining of FoxP3, Ki67 and GzmB was performed using the FoxP3 Transcription Factor Staining Buffer Set (ThermoFisher). Cytokine staining was performed using Cytofix/Cytoperm buffer set (BD Biosciences). For quantification of absolute number of cells, a defined number of fluorescent beads (Cell Sorting Set-up Beads for UV Lasers, ThermoFisher) was added to each sample before acquisition and used as a counting reference. Cells were acquired using BD LSR Fortessa or BD FACSymphony instruments.

### Phospho-flow cytometry

For pSTAT5 staining TILs and LN cells were rested for 2h in FCS-free RPMI media followed by 10 min stimulation with 50 IU/ml of IL-2 (Peprotech) at 37°C and fixed for 30 min with Fixation/Permeabilization buffer (ThermoFisher) and Perm Buffer III (BD Phosflow) on ice followed by the intracellular staining with anti-pSTAT5 and anti-Foxp3 antibodies. Cells were stained for 20 minutes prior to IL-2 stimulation with BD Horizon Fixable Viability Stain 450 (562247, BD Bioscience).

### Mouse T cells activation assays

Purified CD4<sup>+</sup> T cells (CD4 T cells beads, Miltenyi or CD4 Dyna Beads, Invitrogen) were labeled with CFSE or CellTrace Violet (CTV) (ThermoFisher) according to manufacturer's protocol and cultured in RPMI 1640 complete medium supplemented with 10% fetal bovine serum (FBS, GIBCO Sigma), 100 U/mL penicillin, 100  $\mu\text{g}/\text{mL}$  streptomycin and 2 mM L-glutamine (all from GIBCO) together with DC and irradiated feeder cells (40 Gy) in 2:1:1 ratio for 72 or 96h. Polyclonal CD4<sup>+</sup> T cells were stimulated with  $\alpha\text{CD3}$  (2C11) and  $\alpha\text{CD28}$  (37.51) (BioXcell); OT-II cells with OVA<sub>323-339</sub> (ISQAVHAHAHAEINEAGR) peptide (Pepsan) and Trp1 cells with Trp1<sub>106-130</sub> (SGHNCGTCPGWRGAACNPKILTVR) peptide (Pepsan) at concentration indicated in the [Figure 2](#). Cells were additionally supplemented with IL-2, IL-15 or IL-7 (Peprotech) at a concentration indicated in the [Figure 2](#). Mouse CD4<sup>+</sup> T cells were cultured with  $\alpha\text{CD25}$  (PC61, BioXcell) and  $\alpha\text{IL-2}$  (JES6-1A12, BioXcell), added to the culture 24h post stimulation with  $\alpha\text{CD3}$  and  $\alpha\text{CD28}$  in a concentration of 5  $\mu\text{g}/\text{ml}$ .

### Human T cells activation assays

Human PBMCs were isolated from healthy volunteers' blood (Ethics: UCL REC Project ID 8261/001). FACS-purified human CD4<sup>+</sup> T cells were cultured in RPMI complete medium with irradiated autologous feeder cells in 1:1 ratio for 96h, stimulated with  $\alpha\text{CD3}$  (OKT3) and  $\alpha\text{CD28}$  (9.3; BioXcell). To some wells  $\alpha\text{CD25}$  antibody (Basiliximab; Novartis) was added 48 hours post  $\alpha\text{CD3}$  +  $\alpha\text{CD28}$  stimulation. For Treg suppression assays FACS-purified naive human CD4<sup>+</sup> T cells were co-cultured with autologous Treg cells at indicated ratios ([Figure 2](#)), to some wells IL-2 (Peprotech) was added.

### Cytotoxicity assays

For *in vitro* killing assays Th-ctx Trp1 cells were purified from tumors and draining LN at day 7 post transfer and expanded for 72h with Trp1 peptide (1  $\mu\text{M}$ ), DCs and 20 IU IL-2. Target B16 cells were preconditioned with IFN $\gamma$  overnight to increase MHC-II expression and labeled with 5  $\mu\text{M}$  CFSE (ThermoFisher) and plated together with control cell line labeled with 0.5  $\mu\text{M}$  CFSE 1:1 on 96-well plate. Effector Trp1 cells were labeled with CTV (ThermoFisher) and co-culture with target cells for 16 hours. Cells were stained with live/dead dye (Viability dye eFluor780) for FACS analysis. OT-II cells were activated with DCs and OVA peptide (1  $\mu\text{M}$ ) and either

plated with B16-OVA and control cell line for 16h or cytotoxicity was measured using the GranToxiLux-PLUS kit (Oncoimmunin, Gaithersburg, MD, USA), according to the manufacturer's instructions. Briefly, target cells were identified by labeling with a target fluorescent probe (TFL-4) and with a nuclear fluorescent labeling probe (NFL1), to exclude cells that had died before the start of the assay. Effector (OT-II) and target cells were mixed at a ratio of 5:1 and co-incubated in the presence of a FITC-conjugated GzmB substrate for 2 hours. Cytotoxic activity was detected by the cleavage of the substrate, which released FITC and thus rendered target cells fluorescent.

### Granzyme B ELISPOT

Purified CD4<sup>+</sup> TILs (800 cells/well) and LN cells (10,000 cells/well) from MCA205  $\alpha$ CTLA-4 treated tumors were cultured on anti-GzmB coated ELISPOT Plate (R&D) for 24h with unpulsed DC or MCA205-pulsed DCs and 50  $\mu$ g/ml anti-MHC-II (M5/114). ELISPOT Assay was performed according to manufacturer's protocol.

### Immunohistochemistry

The following primary antibodies were used for the multiplex immunohistochemistry (IHC): anti-FoxP3 (clone 236A/E7; dilution 1:100, a gift from Dr. G. Roncador, CNIO, Madrid, Spain); anti-CD4 (clone 4B12; dilution 1:30, Leica Microsystems, Newcastle-upon-Tyne, UK) and GzmB (clone 11F1; dilution 1:40, Leica Microsystems, Newcastle-upon-Tyne, UK). To establish optimal staining conditions (i.e., antibody dilution and incubation time, antigen retrieval protocols, suitable chromogen) each antibody was tested and optimized on 2-4  $\mu$ m cut tissue sections of human reactive tonsil by conventional single immunohistochemistry using the automated platforms BenchMark Ultra (Ventana/Roche) and the Bond-III Autostainer (Leica Microsystems) according to the protocols described elsewhere (Akarca et al., 2013; Marafioti et al., 2008). Tissue sections (4 $\mu$ m) from formalin-fixed and paraffin-embedded blocks of human tumor samples (clinicaltrials.gov: NCT01323517) were de-waxed and re-hydrated before subjected to multiplex-IHC. The procedure was performed following the principles of previously established protocols (Marafioti et al., 2003)(Marafioti et al., 2008) adapted using the Ventana Benchmark Ultra immunostainer. Briefly, tissue sections were subjected to antigen retrieval following the conventional protocol of the Ventana Benchmark Ultra and then incubated with each primary antibody for 30 minutes. Sites of labeling were detected using the peroxidase-based detection reagent conjugate (OptiView DAB IHC Detection Kit) followed by the alkaline phosphatase detection kit (UltraView Universal Alkaline Phosphatase Red Detection Kit), both from Ventana Medical Systems, Inc. After staining, samples were washed in buffers and distilled water and mounted in Apathys mounting medium (TCS Biosciences Ltb). Specificity of the staining was assessed by a hematopathologist (TM) with expertise in multiplex-immunostaining. For evaluation of protein co-expression in the cytoplasm or cell membrane, change of the single color of the chromogen was noted i.e., brown and blue gave rise to almost black labeling while co-expression of cytoplasmic and/or membranous with nuclear proteins was revealed by either brown and/or blue with the nuclear green labeling. No nuclear counterstaining with Haematoxylin was performed. Double positive CD4<sup>+</sup>GzmB<sup>+</sup> and CD4<sup>+</sup>Foxp3<sup>+</sup> cells were quantified in QuPath software. Briefly on average six representative areas (0.25 mm<sup>2</sup>) were selected within each tumor areas ranging from minimum of 2 to maximum of 10 areas. Areas with necrotic tissue were excluded from the analysis. The average cells count per 0.5 mm<sup>2</sup> tumor tissue was calculated.

### Quantitative qPCR

RNA from FACS-purified CD4<sup>+</sup>CD25<sup>lo</sup> TILs from MCA205 tumor was extracted with RNeasy micro kit (QIAGEN) according to manufacturer's protocol. Amount of RNA was quantified with Qubit (ThermoFisher). Synthesis of cDNA was carried out with SuperScript III reverse transcriptase (ThermoFisher). Purified cDNA was then used as template for the quantitation of the indicated genes using gene-specific primers (Table S3). qPCR was performed with QuantiTect Sybr Green PCR kit Syber reagents (QIAGEN). Values were normalized and plotted according to the expression of *Hprt1* in the same samples, using a  $\Delta\Delta C_T$  method.

### Th-ctx and Th Trp1 transcriptome analysis

B16-bearing mice were treated with  $0.6 \times 10^5$  naive Foxp3<sup>GFP</sup> Trp1 cells, irradiated GVAX and  $\alpha$ CTLA-4 (Th condition) or irradiation (5Gy) and  $\alpha$ CTLA-4 (Th-ctx condition), details Figure S1. Control mice received naive Trp1 cells only (control). 8 days after transfer Trp1 GFP<sup>+</sup> (Foxp3-negative) cells were FACS purified. RNA was isolated using TRIzol (Invitrogen) according to the manufacturer's protocol. The GeneChip<sup>®</sup> Mouse Genome 430 2.0 Array (Affymetrix) was used to analyze the transcriptome. Raw expression values were normalized using the robust multi-array average (RMA) procedure (Irizarry et al., 2003) implemented in the package affy (Bioconductor). Differential gene expression analysis was carried out on all genes, or a selection of previously described transcription factors (Gerstberger et al., 2014) in the package limma (Smyth, 2004). Gene set enrichment analysis (GSEA) was conducted using the package fgsea with 1000 permutations (Sergushichev, 2016), with reactome and MSigDB C7 signature sets (Godec et al., 2016). Correction for multiple testing was carried out using the Benjamini-Hochberg method. All microarray analyses were done in the R statistical programming environment.

### Software

Flow cytometry data were analyzed with FlowJo v10.0.8 (Tree Star). IHC data were analyzed with QuPath (v0.1.2). Statistical analyses were done with Prism (v6 and v7) (GraphPad Software). All microarray analyses were done in the R statistical programming environment.

### QUANTIFICATION AND STATISTICAL ANALYSIS

Statistical analyses were done with Prism v6 and v7 (GraphPad Software); p values were calculated using one or two-way ANOVA with Tukey post-tests (ns =  $p > 0.05$ , \*  $p < 0.05$ , \*\*  $p < 0.01$ , \*\*\*  $p < 0.001$ , \*\*\*\*  $p < 0.0001$  for 1 way ANOVA and \*  $p < 0.033$ , \*\*  $p < 0.0021$ , \*\*\*  $p < 0.0002$ , \*\*\*\*  $p < 0.0001$  for 2-way ANOVA). Kaplan-Meier curves were analyzed with the log-rank test. N in animal experiments refers to number of animals per experimental group.

### DATA AND CODE AVAILABILITY

The accession number for the Trp1 microarray reported in this paper is GEO: GSE141540.

**Supplemental Information**

**Regulatory T Cells Restrain Interleukin-2-  
and Blimp-1-Dependent Acquisition  
of Cytotoxic Function by CD4<sup>+</sup> T Cells**

**Anna Śledzińska, Maria Vila de Mucha, Katharina Bergerhoff, Alastair Hotblack, Dafne Franz Demane, Ehsan Ghorani, Ayse U. Akarca, Maria A.V. Marzolini, Isabelle Solomon, Frederick Arce Vargas, Martin Pule, Masahiro Ono, Benedict Seddon, George Kassiotis, Charlotte E. Ariyan, Thomas Korn, Teresa Marafioti, Graham M. Lord, Hans Stauss, Richard G. Jenner, Karl S. Peggs, and Sergio A. Quezada**



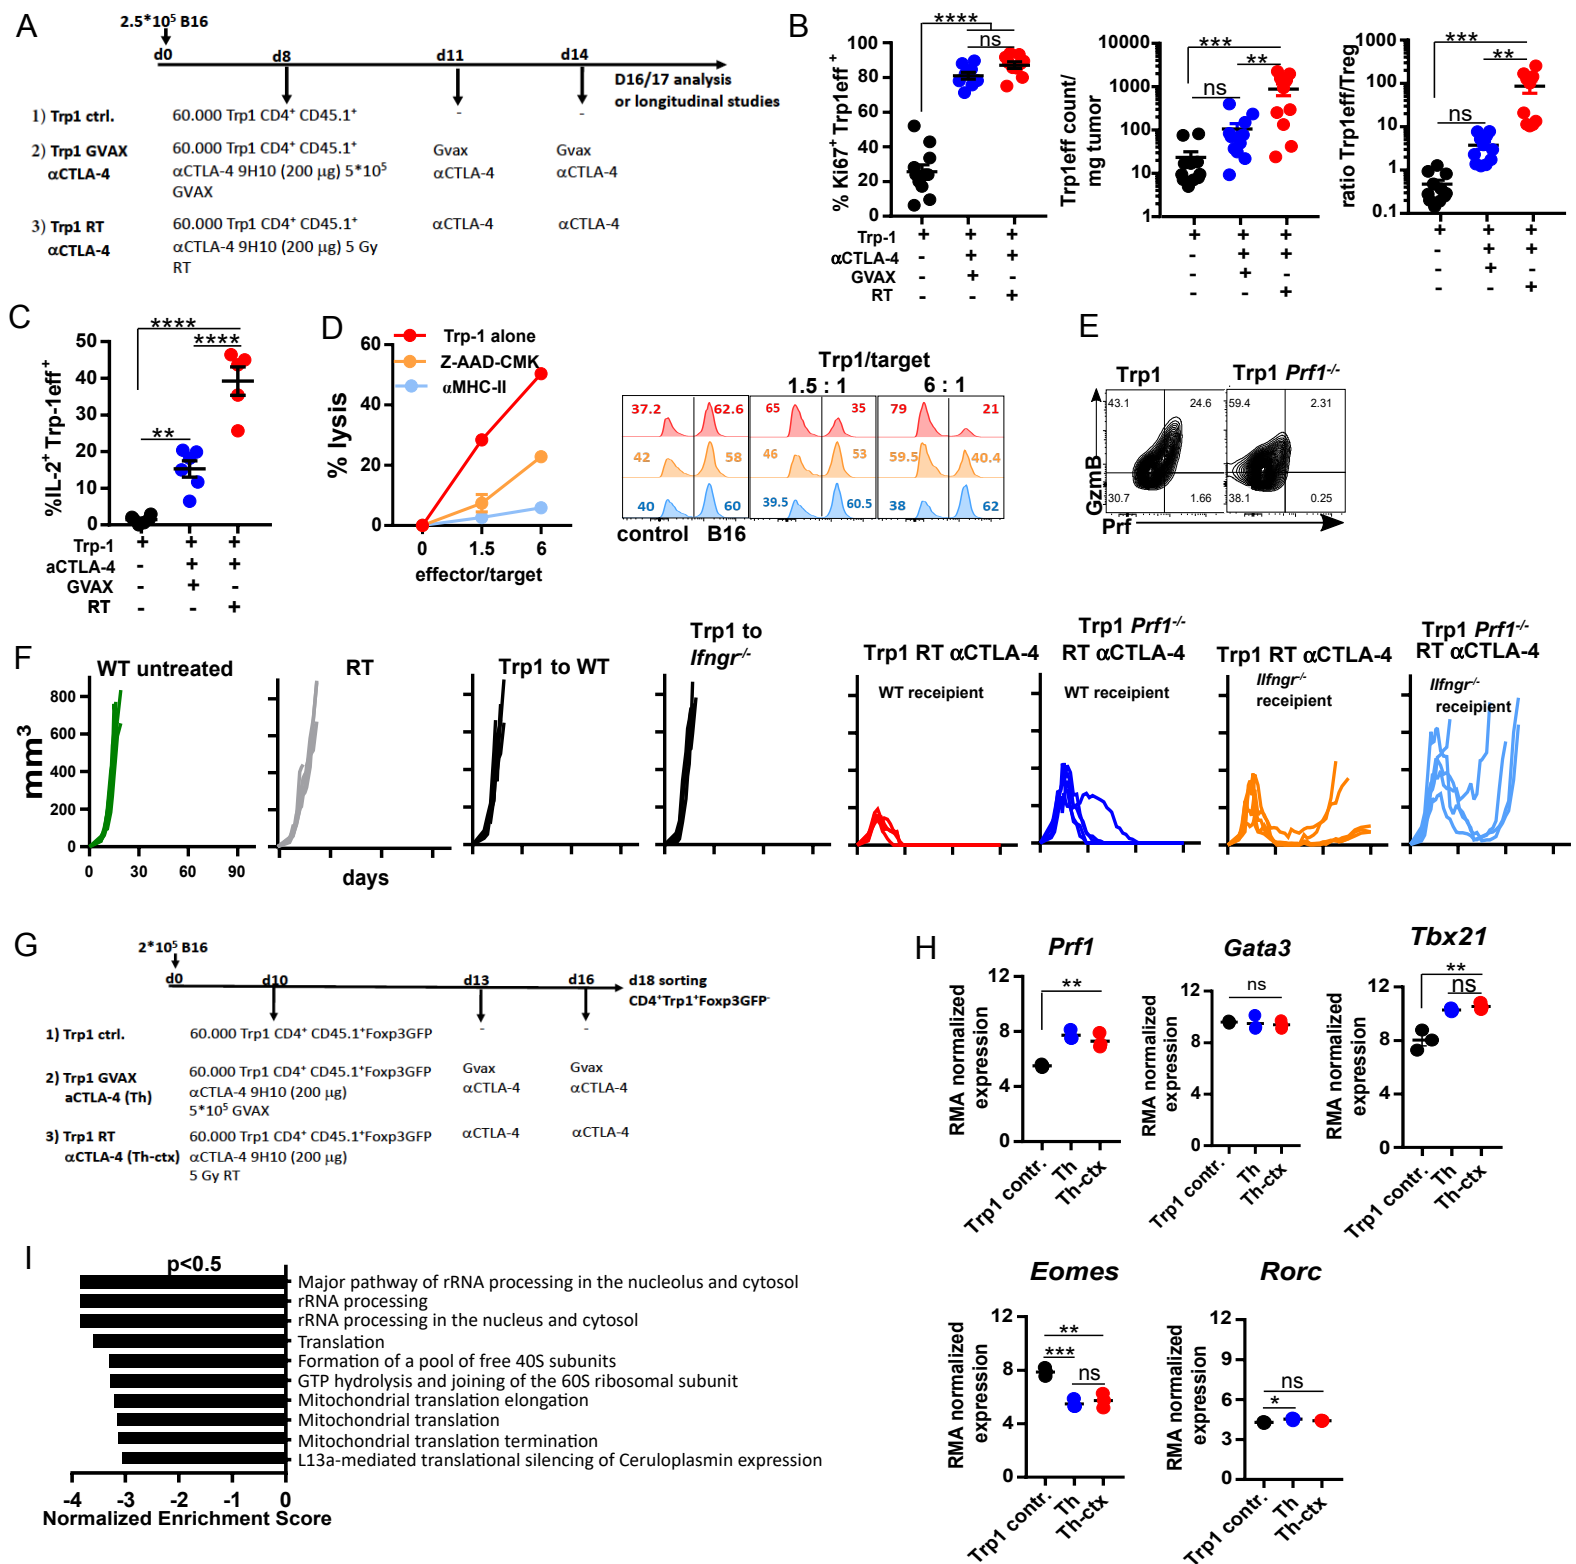

**Figure S1 related to Figure 1. Tumor-reactive CD4<sup>+</sup> T cell acquire cytotoxic phenotype in tumor microenvironment following lymphopenia induced expansion.**

(A-C) B16 tumor-bearing mice were treated at day 8 with 0.6\*10<sup>5</sup> Trp-1 cells alone or combine with αCTLA-4, radiation or GVAX. (A) Experimental schema Figure 1A. (B) TILs were isolated at day 16 post tumor inoculation. Quantification of Ki67-expressing Trp1 cells, number or Trp1 effector cells and Trp1 effector to all Treg ratio in tumor (n=10-11 mice/group, cumulative data of 2 independent experiments). (C) Quantification of IL-2-expressing cells within Trp1 compartment (N=5-6 mice/group). (D) In vitro killing assay. CD4<sup>+</sup>Trp1<sup>+</sup> T cells were primed *in vivo*, expanded *in vitro* for 72h and co-cultured with CFSE -labelled (5 μM) B16 melanoma and CFSE-labelled (0.5 μM) control cell line with additional MHC-II blocking or in the presence of 25 μM Z-AAD-CMK for 16h. Analysis by FACS. Shown are percentage of specific lysis of B16 cells and representative FACS plots showing frequency of live B16 cells in relation to control cell line in indicated conditions. Representative data of 2 independent experiments. (E) Trp1 and Trp1x Prf-1-deficient cells were stimulated with Trp1 peptide (1 μM) for 72 h. Representative plots showing expression of GzmB and Prf1. (F) Experiment as in Figure 1E. Tumor growth curves of individual mice. (G-I) Transcriptome analysis (G) Experimental schema Figure 1D-F. (H) RMA normalized expression of *Prf1* and selected transcription factors in Trp1 Th and Trp1 Th-ctx condition in comparison to Trp1 control cells (I) Reactome pathways enrichment analysis. Shown are the highest upregulated pathway in Th condition (NES >2, p < 0.5).

All quantification plots: mean ± SEM, 1-way ANOVA (\* p<0.05, \*\*p<0.01, \*\*\*p<0.001, \*\*\*\*p<0.0001)

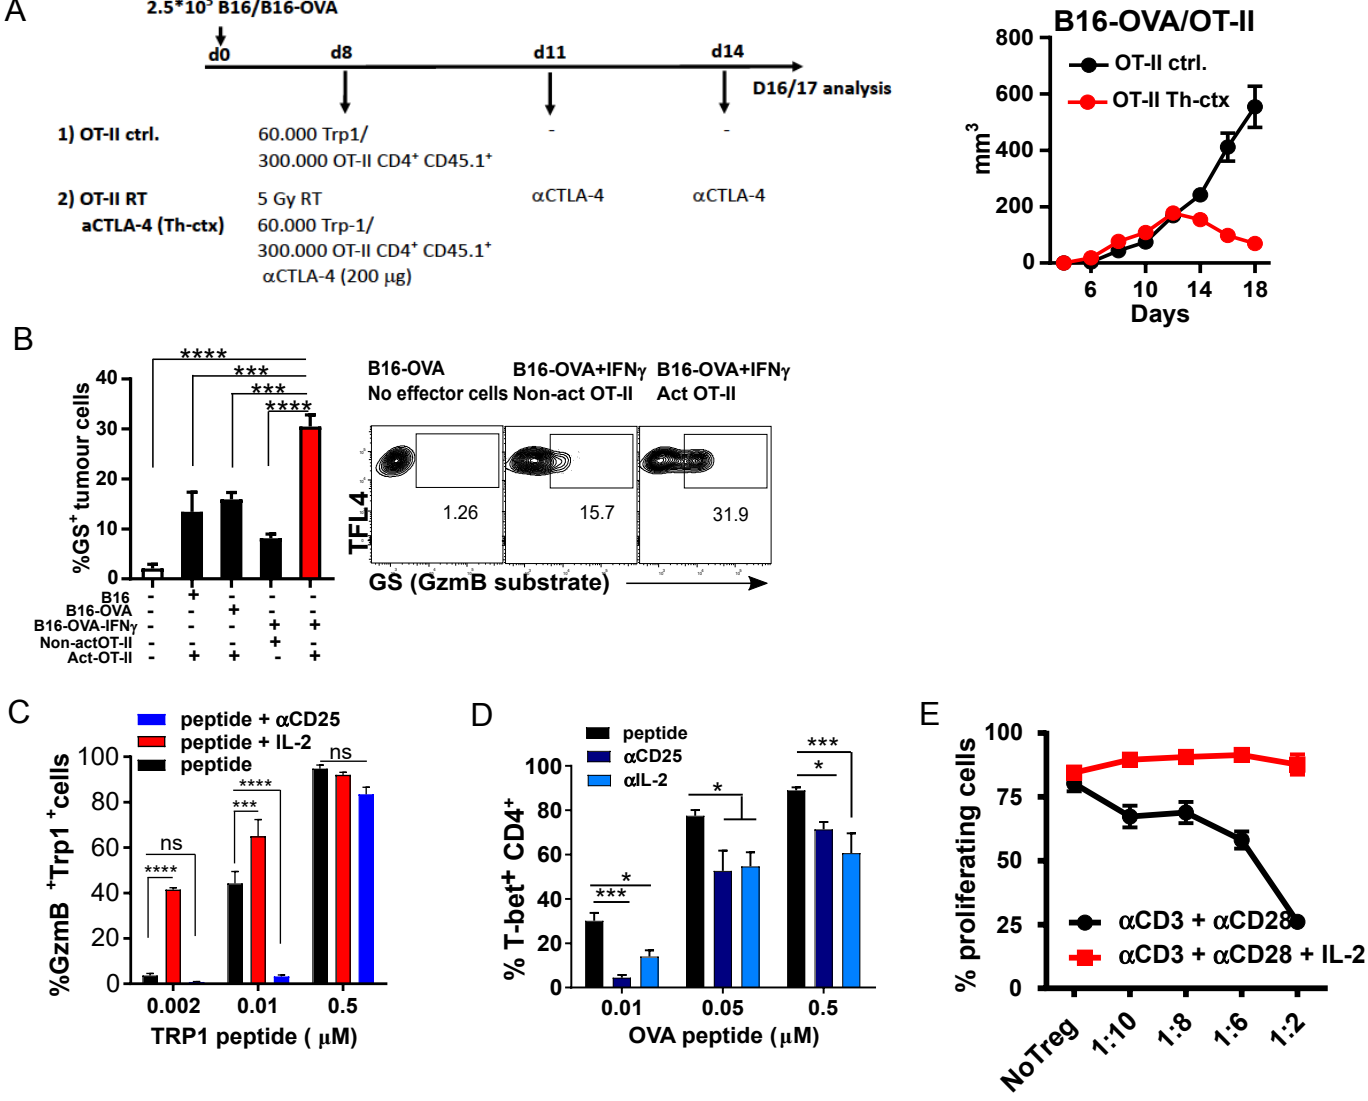

**Figure S2 related to Figure 2. Blocking of IL-2 signaling in vitro decreases Gzm B expression by mouse and human CD4<sup>+</sup> T cells.**

(A) OT-II T cells transfer to B16-OVA-bearing mice. Experimental schema Figure 1G and tumor growth. (B) Activated or non-activated OT-II cells were culture with B16-OVA or B16 cell for 2 h in the presence of GzmB substrate. Representative plots showing GzmB substrate- positive B16 or B16-OVA cells and quantification. Representative data of two independent experiments. (C) CTV-labelled Trp1 cells were cultured for 72h with APC and indicated amount of peptide either with 100 IU/ml IL-2 or 5 μg/ml CD25. Quantification of GzmB-expressing cells within proliferating compartments. (D) CTV-labelled OT-II cells cultures as in Figure 2D with or without 5 μg/ml of indicated antibodies. Quantification of T-bet expressing CD4<sup>+</sup> T cells within proliferating compartments. (E) Experiment as in Figure 2J. Quantification of proliferating CD4<sup>+</sup> T cells in indicated conditions without and with addition of IL-2.

All quantification plots: mean ± SEM, 1-way ANOVA (\* p<0.05, \*\*p<0.01, \*\*\*p<0.001, \*\*\*\*p<0.0001)

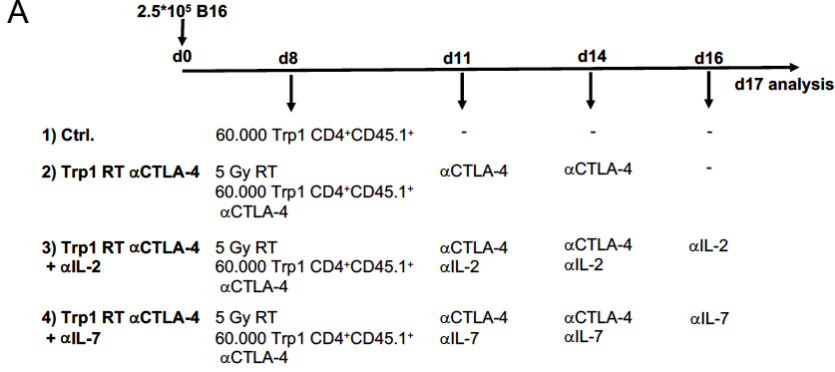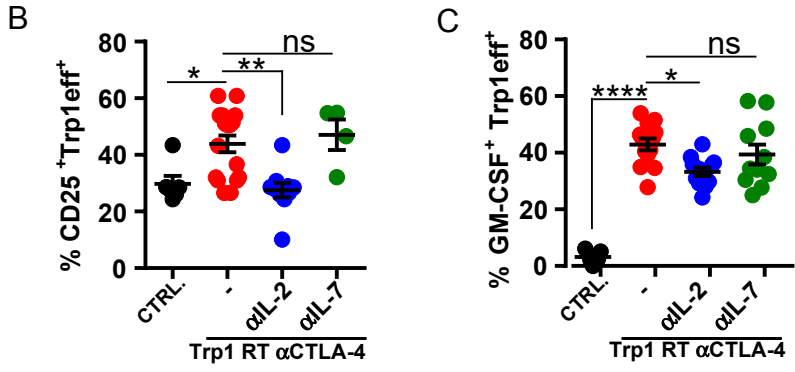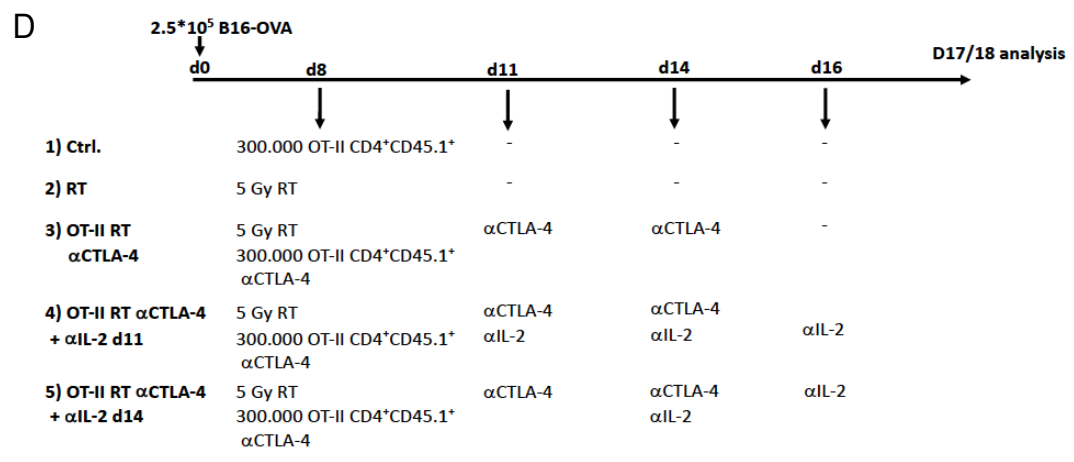

**Figure S3 related to Figure 3. CD4 TILs in Th-ctx condition reduce Gzm B expression but retain Th1 phenotype upon IL-2 neutralization.**

(A-C) B16 tumor-bearing mice received Trp1 cells at day 8 post tumor inoculation either after irradiation (Th-ctx) or without (Ctrl) and followed by αCTLA-4 and cytokine neutralizing antibodies treatment. (A) Schema of experiment in Figure 3 (A-C). (B) Quantification of CD25<sup>+</sup> expressing cells (C) Quantification of GM-CSF-expressing cells within Trp1eff compartment (N= 7-13 mice/group, cumulative data of 2 independent experiments). (D) B16-OVA-tumour bearing mice received OT-II cells at day 8 post tumor inoculation alone or in combination with RT and cytokine neutralizing antibodies. Schema of experiment in Figure 3D-E.

All quantification plots: mean ± SEM, 1-way ANOVA (\* p<0.05, \*\*p<0.01, \*\*\*p<0.001, \*\*\*\*p<0.0001)

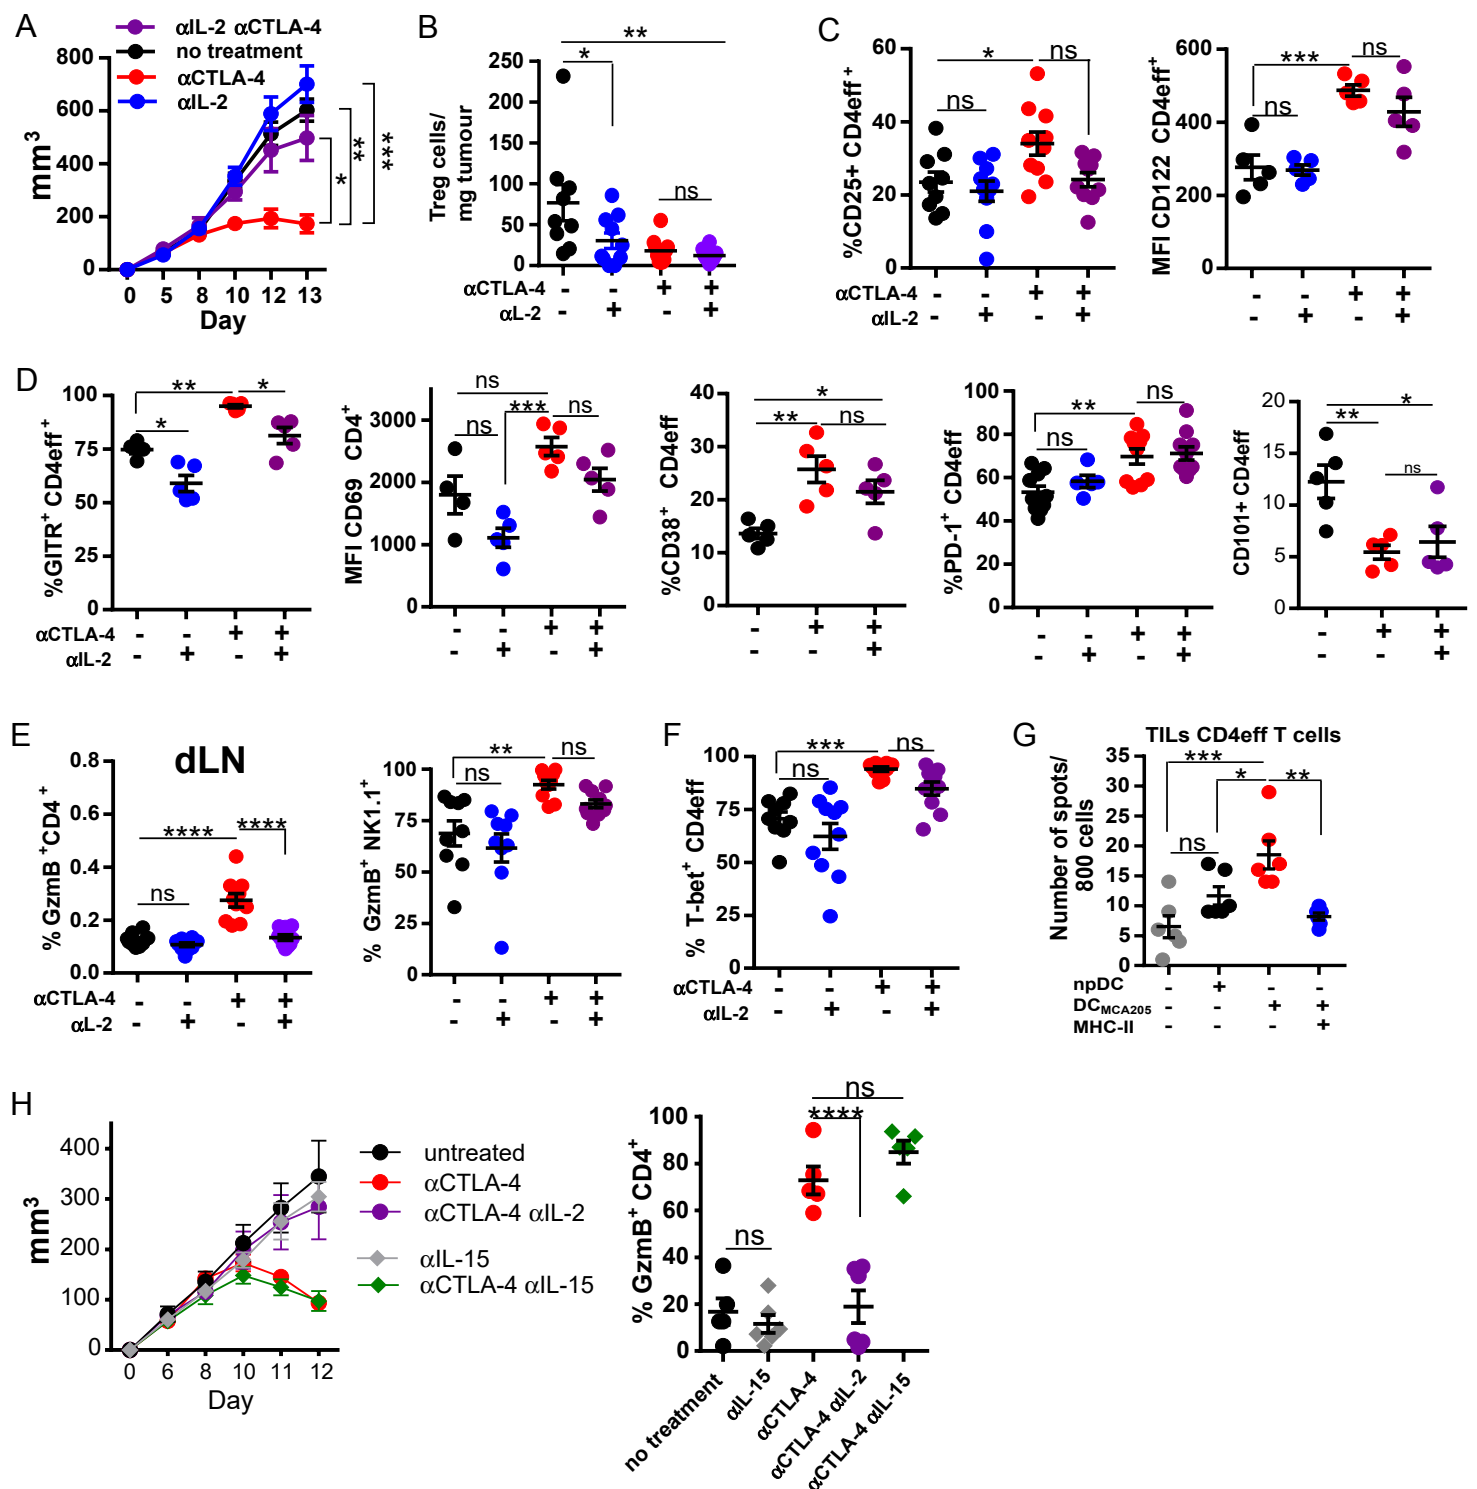

**Figure S4 related to Figure 4. Increased level of available IL-2 after Treg depletion contributes to shaping T helper cells phenotype in the tumor microenvironment.**

**(A–F)** Experiment as in **Figure 4C–G**. **(A)** Tumor growth. **(B)** Quantification of Treg cell within CD4<sup>+</sup> TILs compartment at day 13 post tumor inoculation in indicated conditions as in **Figure 4C** (N=10 mice/group, cumulative data of 2 independent experiments). **(C)** Quantification of CD25 and CD122-expressing cells within CD4eff compartment (N= 5-10 mice/group, cumulative data of 2 independent experiments). **(D)** MCA205 TILs: Quantification of indicated markers within CD4eff compartment as in **Figure 4E**. **(E)** Quantification of GzmB-expressing cells within dLN Treg and NK1.1 cells compartment (N=10 mice/group, cumulative data of 2 independent experiments). **(F)** Quantification of T-bet-expressing cells within CD4<sup>+</sup> T cells. **(G)** 800 CD4 TILs cells were cultured unstimulated or stimulated with non-pulsed DCs or MCA205-pulsed DCs on aGzmB-coated ELISPOT plate for 24h. Numbers represents GzmB spots per 800 responding CD4 T cells. **(H)** MCA205 tumor-bearing mice were treated with 100 μg of αCTLA-4 9H10 antibody on days 6, 8, and 10 after tumor implantation alone or combined with 200 μg of αIL-2 or αIL-15 on days 6, 8, 10 after tumor implantation. Growth curves of MCA205 tumors, showing the product of three orthogonal tumor diameters and quantification of GzmB expression by CD4<sup>+</sup> TILs are shown (N=5 mice/group).

All quantification plots: mean ± SEM, 1-way ANOVA (\* p < 0.05, \*\* p < 0.01, \*\*\* p < 0.001, \*\*\*\* p < 0.0001)

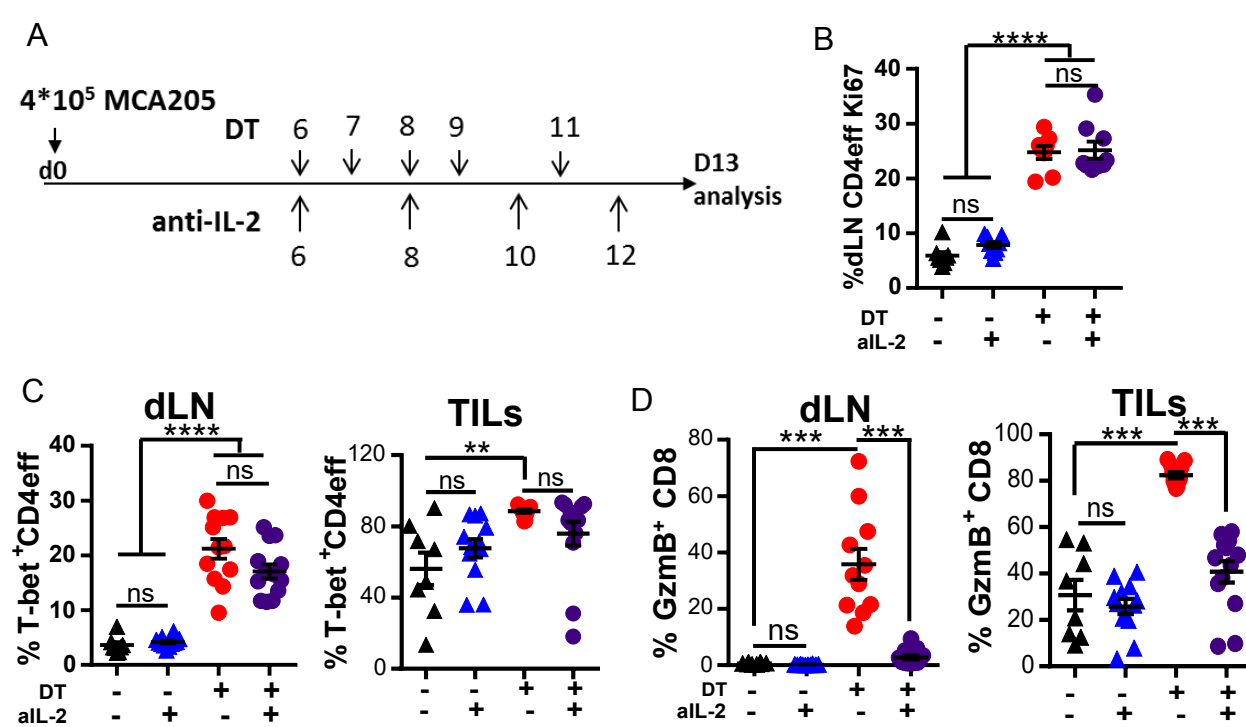

**Figure S5 related to Figure 5. Treg depletion without CTLA-4 blocking is sufficient to drive GzmB expression by CD4<sup>+</sup> T cells.**

(A-D) Foxp<sup>DTR</sup> MCA205 tumor-bearing mice were treated from d6 with DT at days 6, 7, 8, 9 and 10 and aIL-2 (200µg) at days 6, 8, 10 and 12. (A) Schema of experiment as in Figure 5A-E. (B) Quantification of Ki67- expressing CD4<sup>+</sup> T cells in dLN and TILs. (C) T-bet-expressing CD4<sup>+</sup> T cells in dLN and TILs. (D) Quantification of GzmB-expressing CD8<sup>+</sup> T cells in dLN and TILs (N=10 mice/group, cumulative data of 2 independent experiments).

All quantification plots: mean ± SEM, 1-way ANOVA (\* p<0.05, \*\*p<0.01, \*\*\*p<0.001, \*\*\*\*p<0.0001)

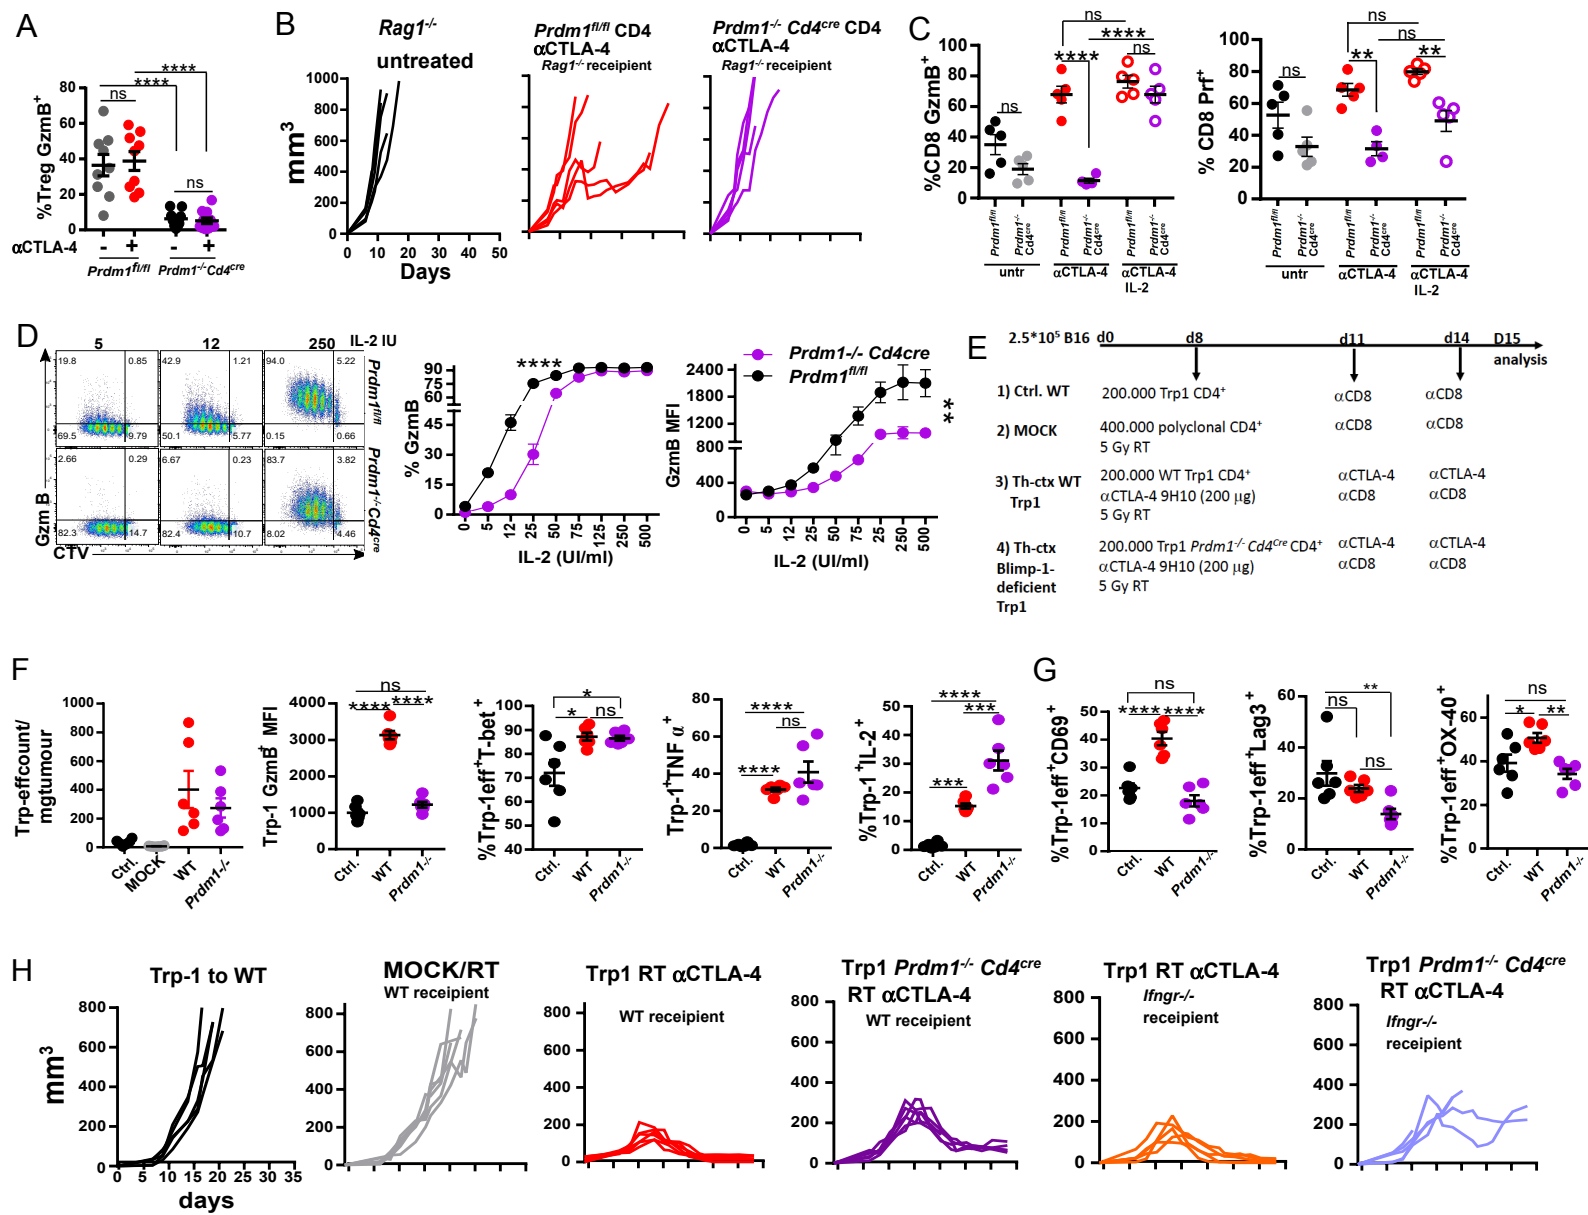

**Figure S6 related to Figure 7. IL-2 milieu in tumor controls differentiation of cytotoxic CD4<sup>+</sup> T cells in Blimp-1-dependent manner.**

**(A)** Experiment as in **Figure 7B-C**. Quantification of Gzm B -expressing cells within Treg TILs compartment. **(B)** Experiment as in **Figure 7D**. Tumor growth of individual mice. **(C)** Experiment as in **Figure 7F**. Representative plots and quantification of GzmB-and Prf-1-expressing cells within CD8 TILs (N=5 mice/group). **(D)** CTV-labelled MACS-sorted CD4<sup>+</sup> T cells from WT and *Prdm1<sup>-/-</sup>Cd4<sup>cre</sup>* mice were cultured for 72h in the presence of APCs with 0.1  $\mu$ g/ml  $\alpha$ CD3 antibody and indicated amount of IL-2. Representative plots and quantification of GzmB expressing CD4<sup>+</sup> T cells within proliferating cell, MFI of GzmB expressing CD4<sup>+</sup> T cells within proliferating cells (n=3, representative data of 2 independent experiments). **(E-G)** Experiment as in **Figure 7G-H**. **(E)** Schema of the experiment. **(F)** Quantification of GzmB and cytokines within Trp-1 compartment in indicated conditions. **(G)** Quantification of indicated molecules within Trp-1 compartment in indicated conditions. **(H)** Experiment as in **Figure 7J**. Tumor growth curves of individual mice are shown.

All quantification plots: mean  $\pm$  SEM, 1-way ANOVA (\* p<0.05, \*\*p<0.01, \*\*\*p<0.001, \*\*\*\*p<0.0001)
